# Supplementary material for: Synthesis and conformation of a novel fluorescein–Zn-porphyrin dyad and intramolecular energy transfer
Source: Royal Society of Chemistry journal article supplement (doi:10.1039/c5nj02901e), 2016-01-01
Supplement: c5nj02901e1.pdf [file c5nj02901e1.pdf]

Supporting information available for

**Synthesis and Conformation of a Novel Fluorescein-Zn-Porphyrin Dyad and  
Intramolecular Energy Transfer**

Olivier Rezazgui,<sup>a</sup> Patrick Trouillas,<sup>b,c,\*</sup> Shi-hong Qiu,<sup>a</sup> Benjamin Siegler,<sup>d</sup> Johannes  
Gierschner,<sup>e</sup> Stéphanie Leroy-Lhez<sup>a,\*</sup>

<sup>a</sup> LCSN EA1069, Univ. Limoges, 123 Avenue Albert Thomas, 87060 Limoges, France

<sup>b</sup> INSERM UMR 850, Univ. Limoges, School of Pharmacy, 2 rue du Docteur Marcland, 87025 Limoges Cedex, France

<sup>c</sup> Regional Centre of Advanced Technologies and Materials, Department of Physical Chemistry, Faculty of Science, Palacký University, tř. 17 listopadu 12, 771 46 Olomouc, Czech Republic

<sup>d</sup> PIAM, Université d'Angers, LUNAM Université, Angers, France

<sup>e</sup> Madrid Institute for Advanced Studies - IMDEA Nanoscience, C/ Faraday 9, Ciudad Universitaria de Cantoblanco, E-28049 Madrid, Spain

\* corresponding author

**Contents**

|                                                                                       |           |
|---------------------------------------------------------------------------------------|-----------|
| <b>1. NOESY spectrum of dyad 1 at 323 K.....</b>                                      | <b>2</b>  |
| <b>2. Excitation and emission spectra of dyad 1.....</b>                              | <b>3</b>  |
| <b>3. DFT calculations of dyad 1 (linear and folded form).....</b>                    | <b>4</b>  |
| <b>4. TD-DFT calculations of compounds 1, 2 and 3.....</b>                            | <b>5</b>  |
| <b>4-1. Excited states data.....</b>                                                  | <b>5</b>  |
| <b>4-2. Excited states diagram.....</b>                                               | <b>11</b> |
| <b>5. CT state between porphyrin and fluorescein patterns (B3LYP functional).....</b> | <b>13</b> |
| <b>6. Computational data.....</b>                                                     | <b>14</b> |
| <b>6-1. Ground states.....</b>                                                        | <b>14</b> |
| <b>6-2. Excited states calculations.....</b>                                          | <b>24</b> |
| <b>7. References.....</b>                                                             | <b>34</b> |

# 1. NOESY spectrum of dyad 1 at 323 K

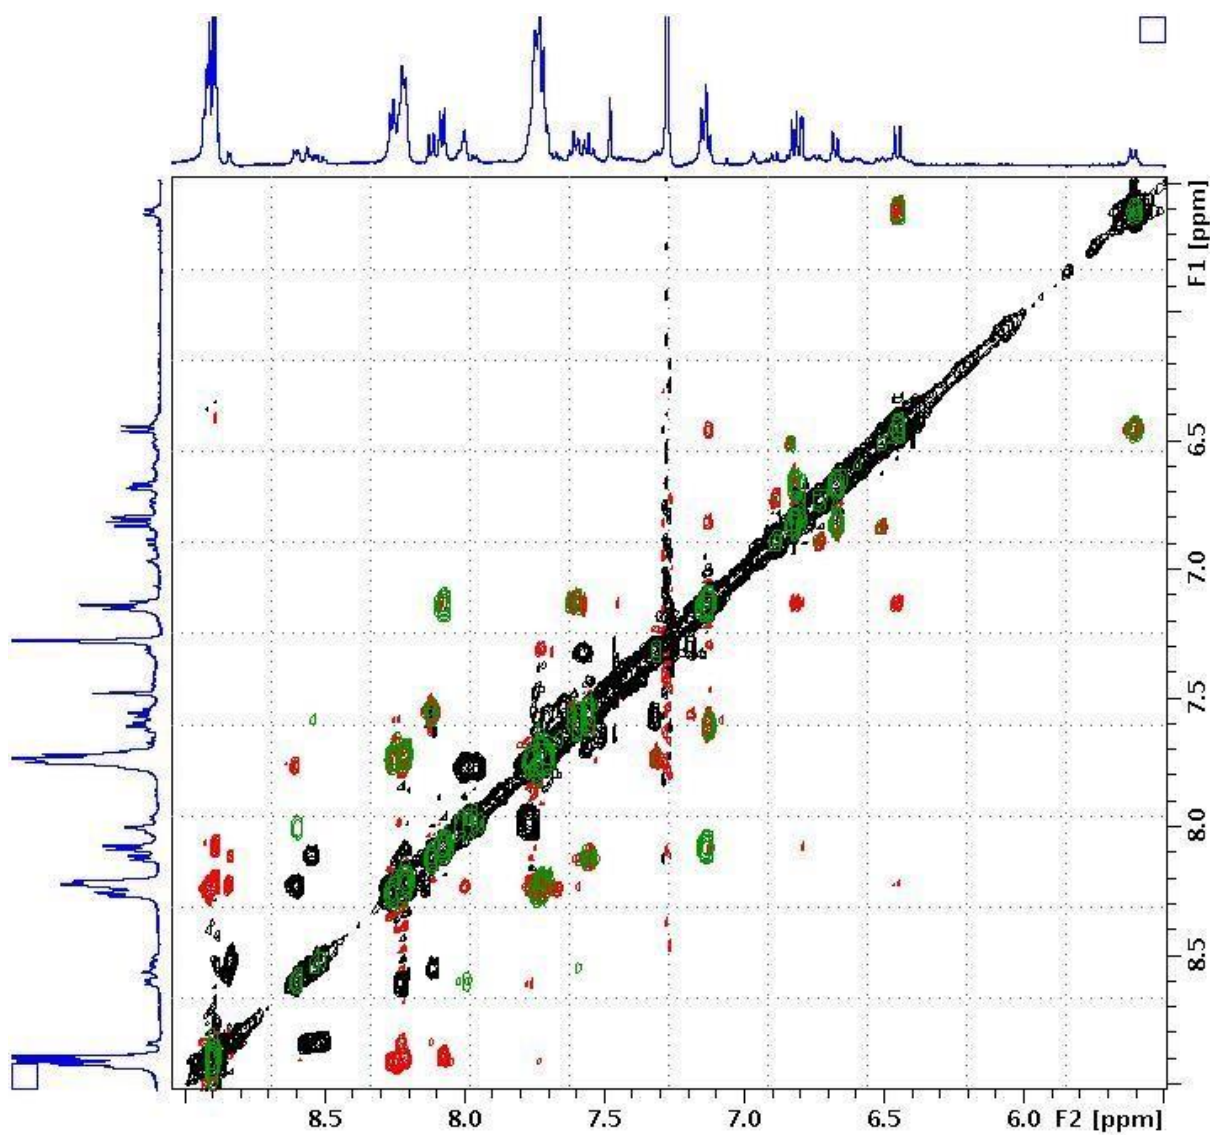

**Figure 1:** Aromatic region of the NOESY spectrum of 1 at 323 K.

## 2. Excitation and emission spectra of dyad **1**

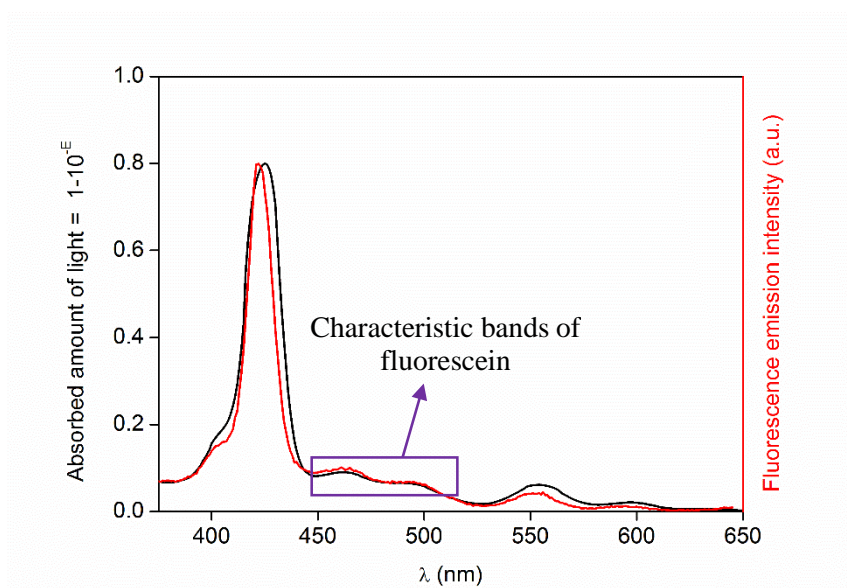

**Figure 2:** Comparison between excitation (red line,  $\lambda_{\text{obs}} = 650$  nm) and absorption (black line) spectra of dyad **1** in  $\text{CHCl}_3$  (conc.  $2 \times 10^{-6}$  mol.L $^{-1}$ , room temp.).

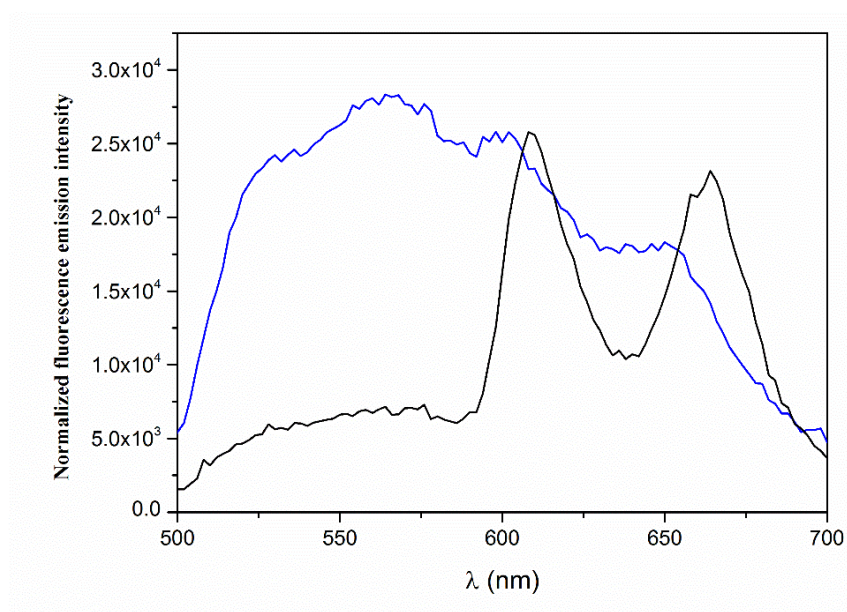

**Figure 3:** Normalized emission spectra  $\lambda_{\text{em}} = 490$  nm (relative to porphyrin emission maximum) of dyad **1** in  $\text{CHCl}_3$  (blue line) and DMSO (black line) at 298 K (conc.  $2 \cdot 10^{-6}$  M).

### 3. DFT calculations of dyad 1 (linear and folded form).

**Table 1:** Total energies of dyad 1 in two conformations (linear and folded form), in different solvents using PCM method. Energies are given in Hartrees and in eV.

|                                 | Gas phase               |             | Chloroform  |             | DMSO        |             | Water       |             |
|---------------------------------|-------------------------|-------------|-------------|-------------|-------------|-------------|-------------|-------------|
|                                 | Linear                  | Folded      | Linear      | Folded      | Linear      | Folded      | Linear      | Folded      |
|                                 | <b>Energy (Hartree)</b> |             |             |             |             |             |             |             |
| <b>B3LYP</b>                    | -3635.3078              | -3635.3140  | -3635.4699  | -3635.4986  | -3635.3564  | -3635.3890  | -3635.3572  | -3635.3949  |
| <b><math>\omega</math>B97XD</b> | -3634.1359              | -3634.1359  | -3634.2429  | -3634.2827  | -3634.1566  | -3634.2086  | -3634.1574  | -3634.2156  |
|                                 | <b>Energy (eV)</b>      |             |             |             |             |             |             |             |
| <b>B3LYP</b>                    | -98922.5407             | -98922.7108 | -98926.9529 | -98927.7348 | -98923.8654 | -98924.7511 | -98923.8867 | -98924.9106 |
| <b><math>\omega</math>B97XD</b> | -98889.8368             | -98890.6517 | -98893.5632 | -98894.6479 | -98891.2161 | -98892.6314 | -98891.2381 | -98892.8207 |

**Table 2:** Energy gap between linear and fold form in dyad 1 in different solvents using PCM method.

|                                 | Gas phase                              | Chloroform | DMSO | Water | Gas phase                              | Chloroform | DMSO   | Water  |
|---------------------------------|----------------------------------------|------------|------|-------|----------------------------------------|------------|--------|--------|
|                                 | $\Delta E$ (linear-folded) in Hartrees |            |      |       | $\Delta E$ (linear-folded) in kJ/mol   |            |        |        |
| <b>B3LYP</b>                    | 0.01                                   | 0.03       | 0.03 | 0.04  | 16.41                                  | 75.44      | 85.45  | 98.79  |
| <b><math>\omega</math>B97XD</b> | 0.03                                   | 0.04       | 0.05 | 0.06  | 78.62                                  | 104.66     | 136.56 | 152.70 |
|                                 | $\Delta E$ (linear-folded) in eV       |            |      |       | $\Delta E$ (linear-folded) in kcal/mol |            |        |        |
| <b>B3LYP</b>                    | 0.17                                   | 0.78       | 0.89 | 1.02  | 3.92                                   | 18.03      | 20.42  | 23.61  |
| <b><math>\omega</math>B97XD</b> | 0.81                                   | 1.08       | 1.42 | 1.58  | 18.79                                  | 25.01      | 32.64  | 36.50  |

## 4. TD-DFT calculations of compounds 1, 2 and 3

### 4-1. Excited states data

**Table 3:** Calculated optical properties (vertical transition wavelengths and energies, oscillator strength, configuration interaction description) as obtained with a) B3LYP and b)  $\omega$ B97XD functionals for compound **1** (folded form).

#### A) B3LYP

| Excited states | $\lambda$ (nm) | E (eV) | f    | MO contribution*                                                                                               |
|----------------|----------------|--------|------|----------------------------------------------------------------------------------------------------------------|
| 1              | 566.9          | 2.19   | 0.01 | H-1→L+2 (14%)<br><b>H→L (68%)</b><br>H→L+1 (-13%)                                                              |
| 2              | 555.3          | 2.23   | 0.07 | H-1→L+1 (35%)<br>H-1→L+2 (19%)<br>H→L+1 (-28%)<br>H→L+2 (50%)                                                  |
| 3              | 553.9          | 2.28   | 0.05 | H-1→L+1 (19%)<br>H-1→L+2 (-32%)<br><b>H→L (19%)</b><br>H→L+1 (50%)<br>H→L+2 (28%)                              |
| 4              | 492.0          | 2.52   | 0.01 | <b>H-1→L (70%)</b>                                                                                             |
| 5              | 422.3          | 2.94   | 0.06 | H-4→L (63%)<br>H-2→L (-25%)                                                                                    |
| 6              | 417.1          | 2.97   | 0.40 | H-4→L (26%)<br>H-2→L (54%)<br><b>H-2→L+1 (-18%)</b><br>H-1→L+1 (19%)<br>H-1→L+2 (-14%)<br>H→L+2 (-12%)         |
| 7              | 407.6          | 3.04   | 1.18 | <b>H-2→L+1 (42%)</b><br><b>H-2→L+2 (-22%)</b><br>H-1→L+1 (35%)<br>H-1→L+2 (24%)<br>H→L+1 (16%)<br>H→L+2 (-25%) |
| 8              | 406.9          | 3.05   | 0.38 | H-2→L (13%)<br><b>H-2→L+1 (53%)</b><br>H-1→L+1 (-19%)<br>H-1→L+2 (-30%)<br>H→L+1 (-20%)<br>H→L+2 (13%)         |
| 9              | 402.8          | 3.08   | 0.58 | H-2→L (-15%)<br>H-2→L+2 (54%)<br>H-1→L+1 (31%)<br>H-1→L+2 (-14%)<br>H→L+2 (-22%)<br>H→L+3 (12%)                |
| 10             | 401.7          | 3.09   | 0.78 | H-2→L (-20%)<br>H-2→L+2 (-37%)<br>H-1→L+1 (13%)<br>H-1→L+2 (-30%)                                              |

|    |       |      |      |                                                               |
|----|-------|------|------|---------------------------------------------------------------|
|    |       |      |      | H→L+1 (-21%)<br>H→L+3 (38%)                                   |
|    |       |      |      | H-2→L (15%)<br><b>H-2→L+2 (13%)</b>                           |
| 11 | 400.8 | 3.09 | 0.50 | H-1→L+1 (-14%)<br>H-1→L+2 (23%)<br>H→L+1 (16%)<br>H→L+3 (58%) |

\*In black : transfer from porphyrin to porphyrin. In **red** : transfer from fluorescein to porphyrin orbitals. In *blue* : from fluorescein to fluorescein.

### B) ωB97XD

| Excited states | λ (nm) | E (eV) | f    | MO contribution*                                                                                    |
|----------------|--------|--------|------|-----------------------------------------------------------------------------------------------------|
| 1              | 572.8  | 2.16   | 0.04 | H-1→L+1 (43%)<br>H→L (54%)                                                                          |
| 2              | 571.6  | 2.17   | 0.07 | H-1→L (-43%)<br>H→L+1 (54%)                                                                         |
| 3              | 388.8  | 3.19   | 1.16 | H-2→L+2 (44%)<br>H-1→L (34%)<br>H-1→L+1 (25%)<br>H→L (-19%)<br>H→L+1 (28%)                          |
| 4              | 384.5  | 3.22   | 1.77 | H-1→L (-35%)<br>H-1→L+1 (42%)<br>H→L (-32%)<br>H→L+1 (-28%)                                         |
| 5              | 377.0  | 3.29   | 1.61 | H-2→L (-10%)<br>H-2→L+2 (50%)<br>H-1→L (-24%)<br>H-1→L+1 (-27%)<br>H→L (21%)<br>H→L+1 (-19%)        |
| 8              | 306.5  | 4.04   | 0.12 | H-9→L+2 (10%)<br>H-7→L+2 (-23%)<br>H-5→L+2 (-14%)<br>H-4→L (-14%)<br>H-4→L+2 (55%)<br>H-2→L+2 (11%) |

\*In black : transfer from porphyrin to porphyrin. In **red** : transfer from fluorescein to porphyrin orbitals. In *blue* : from fluorescein to fluorescein.

### C) CAM-B3LYP

| Excited states | λ (nm) | E (eV) | f    | MO contribution*                               |
|----------------|--------|--------|------|------------------------------------------------|
| 1              | 553.4  | 2.24   | 0.03 | H-1→L+1 (-44%)<br>H→L (53%)<br>H→L (-12%)      |
| 2              | 553.2  | 2.24   | 0.03 | H-1→L (44%)<br>H→L (12%)<br>H→L+1 (53%)        |
| 3              | 384.3  | 3.23   | 1.09 | H-2→L+2 (36%)<br>H-1→L (-18%)<br>H-1→L+1 (43%) |

|   |       |      |      |                                                                              |
|---|-------|------|------|------------------------------------------------------------------------------|
|   |       |      |      | H→L (35%)<br>H→L+1 (15%)                                                     |
| 4 | 382.1 | 3.24 | 2.07 | H-1→L (50%)<br>H-1→L+1 (22%)<br>H→L (18%)<br>H→L+1 (-41%)                    |
| 5 | 373.8 | 3.32 | 1.39 | H-2→L+2 (59%)<br>H-1→L (12%)<br>H-1→L+1 (-25%)<br>H→L (-21%)<br>H→L+1 (-10%) |
| 9 | 302.8 | 4.09 | 0.15 | H-6→L+2 (-27%)<br>H-5→L+2 (57%)<br>H-4→L+2 (-17%)<br>H-2→L+2 (10%)           |

\*In black : transfer from porphyrin to porphyrin. In **red** : transfer from fluorescein to porphyrin orbitals. In *blue* : from fluorescein to fluorescein.

**Table 4:** Calculated optical properties (vertical transition wavelengths and energies, oscillator strength, configuration interaction description) as obtained with a) B3LYP and b)  $\omega$ B97XD functionals for compound **1** (linear form).

#### A) B3LYP

| Excited states | $\lambda$ (nm) | E (eV) | f    | MO contribution*                                                               |
|----------------|----------------|--------|------|--------------------------------------------------------------------------------|
| 1              | 542.7          | 2.28   | 0.04 | H-1→L+2 (42%)<br>H→L+1 (56%)                                                   |
| 2              | 542.4          | 2.29   | 0.04 | H-1→L+1 (-42%)<br>H→L+2 (56%)                                                  |
| 3              | 491.5          | 2.52   | 0.00 | H→L (71%)                                                                      |
| 4              | 446.3          | 2.78   | 0.00 | H-1→L (71%)                                                                    |
| 5              | 426.0          | 2.91   | 0.00 | H-4→L (70%)                                                                    |
| 6              | 412.1          | 3.01   | 0.64 | H-5→L (-16%)<br>H-2→L (67%)                                                    |
| 7              | 399.4          | 3.10   | 1.66 | H-3→L+2 (16%)<br>H-1→L+1 (52%)<br>H-1→L+2 (-15%)<br>H→L+1 (11%)<br>H→L+2 (40%) |
| 8              | 397.4          | 3.12   | 1.59 | H-1→L+1 (16%)<br>H-1→L+2 (54%)<br>H→L+1 (-40%)<br>H→L+2 (12%)                  |

\*In black : transfer from porphyrin to porphyrin. In **red** : transfer from fluorescein to porphyrin orbitals. In *blue* : from fluorescein to fluorescein.

## B) ωB97XD

| Excited states | λ (nm) | E (eV) | f    | MO contribution*                                                                   |
|----------------|--------|--------|------|------------------------------------------------------------------------------------|
| 1              | 561.2  | 2.21   | 0.02 | H-1→L (-44%)<br>H-1→L+1 (-11%)<br>H→L (-13%)<br>H→L+1 (-52%)                       |
| 2              | 561.1  | 2.21   | 0.02 | H-1→L (11%)<br>H-1→L+1 (44%)<br>H→L (52%)<br>H→L+1 (13%)                           |
| 3              | 380.0  | 3.26   | 1.41 | <i>H-4→L+2 (-10%)</i><br><i>H-2→L+2 (64%)</i><br>H-1→L (19%)<br>H→L+1 (16%)        |
| 4              | 377.7  | 3.28   | 1.28 | <i>H-2→L+2 (-24%)</i><br>H-1→L (47%)<br>H-1→L+1 (-17%)<br>H→L (14%)<br>H→L+1 (40%) |
| 5              | 377.3  | 3.29   | 1.93 | H-1→L (17%)<br>H-1→L+1 (51%)<br>H→L (-43%)<br>H→L+1 (14%)                          |

\*In black : transfer from porphyrin to porphyrin. In **red** : transfer from fluorescein to porphyrin orbitals. In *blue* : from fluorescein to fluorescein.

## C) CAM-B3LYP

| Excited states | λ (nm) | E (eV) | f    | MO contribution*                                                                  |
|----------------|--------|--------|------|-----------------------------------------------------------------------------------|
| 1              | 546.5  | 2.27   | 0.01 | H-1→L (-19%)<br>H-1→L+1 (-42%)<br>H→L (48%)<br>H→L+1 (-22%)                       |
| 2              | 546.3  | 2.26   | 0.01 | H-1→L (42%)<br>H-1→L+1 (-19%)<br>H→L (21%)<br>H→L+1 (48%)                         |
| 3              | 378.2  | 3.28   | 2.12 | <i>H-2→L+2 (25%)</i><br>H-1→L (48%)<br>H-1→L+1 (13%)<br>H→L (11%)<br>H→L+1 (-42%) |
| 4              | 377.1  | 3.29   | 1.78 | H-1→L (-13%)<br>H-1→L+1 (52%)<br>H→L (45%)<br>H→L+1 (11%)                         |
| 5              | 375.8  | 3.30   | 0.72 | <i>H-2→L+2 (64%)</i><br>H-1→L (-19%)<br>H→L+1 (17%)                               |

\*In black : transfer from porphyrin to porphyrin. In **red** : transfer from fluorescein to porphyrin orbitals. In *blue* : from fluorescein to fluorescein.



**Table 5:** Computed optical properties obtained with a) B3LYP and b)  $\omega$ B97XD (absorption wavelength, vertical transition energies, oscillator strength, configuration interaction (CI) description) for compound **2** (porphyrin).

**A) B3LYP**

| Excited states | $\lambda$ (nm) | E (eV) | f    | MO contribution*                                                                      |
|----------------|----------------|--------|------|---------------------------------------------------------------------------------------|
| 1              | 555.3          | 2.23   | 0.05 | H-1 $\rightarrow$ L+1 (40%)<br>H $\rightarrow$ L (58%)                                |
| 2              | 554.3          | 2.24   | 0.06 | H-1 $\rightarrow$ L (-41%)<br>H $\rightarrow$ L+1 (58%)                               |
| 3              | 408.8          | 3.03   | 1.62 | H-2 $\rightarrow$ L+1 (24%)<br>H-1 $\rightarrow$ L (53%)<br>H $\rightarrow$ L+1 (38%) |
| 4              | 405.3          | 3.06   | 1.45 | H-2 $\rightarrow$ L (-15%)<br>H-1 $\rightarrow$ L+1 (56%)<br>H $\rightarrow$ L (-39%) |

**B)  $\omega$ B97XD**

| Excited states | $\lambda$ (nm) | E (eV) | f    | MO contribution*                                                                     |
|----------------|----------------|--------|------|--------------------------------------------------------------------------------------|
| 1              | 564.3          | 2.20   | 0.03 | H $\rightarrow$ L (54%)<br>H $\rightarrow$ L+1 (-45%)                                |
| 2              | 564.1          | 2.20   | 0.03 | H-1 $\rightarrow$ L (45%)<br>H $\rightarrow$ L+1 (54%)                               |
| 3              | 380.0          | 3.26   | 1.96 | H-1 $\rightarrow$ L (54%)<br>H $\rightarrow$ L (10%)<br>H $\rightarrow$ L+1 (-45%)   |
| 4              | 379.0          | 3.27   | 1.85 | H-1 $\rightarrow$ L+1 (54%)<br>H $\rightarrow$ L (45%)<br>H $\rightarrow$ L+1 (-10%) |

**C) CAM-B3LYP**

| Excited states | $\lambda$ (nm) | E (eV) | f    | MO contribution*                                        |
|----------------|----------------|--------|------|---------------------------------------------------------|
| 1              | 547.6          | 2.26   | 0.01 | H-1 $\rightarrow$ L+1 (-46%)<br>H $\rightarrow$ L (53%) |
| 2              | 547.5          | 2.26   | 0.01 | H-1 $\rightarrow$ L (46%)<br>H $\rightarrow$ L+1 (53%)  |
| 3              | 378.7          | 3.27   | 1.96 | H-1 $\rightarrow$ L (53%)<br>H $\rightarrow$ L+1 (-46%) |
| 4              | 377.8          | 3.28   | 1.85 | H-1 $\rightarrow$ L+1 (53%)<br>H $\rightarrow$ L (46%)  |

**Table 6:** Computed optical properties obtained with a) B3LYP and b)  $\omega$ B97XD (absorption wavelength, vertical transition energies, oscillator strength, configuration interaction (CI) description) for compound **3** (fluorescein).

**A) B3LYP**

| Excited state | $\lambda$ (nm) | E (eV) | f    | MO contribution*                                     |
|---------------|----------------|--------|------|------------------------------------------------------|
| 1             | 428.8          | 2.89   | 0.59 | H-2 $\rightarrow$ L (15%)<br>H $\rightarrow$ L (68%) |

**B)  $\omega$ B97XD**

| Excited state | $\lambda$ (nm) | E (eV) | f    | MO contribution*                                      |
|---------------|----------------|--------|------|-------------------------------------------------------|
| 1             | 387.0          | 3.20   | 0.80 | H-1 $\rightarrow$ L (-11%)<br>H $\rightarrow$ L (69%) |

**C) CAM-B3LYP**

| Excited state | $\lambda$ (nm) | E (eV) | f      | MO contribution*        |
|---------------|----------------|--------|--------|-------------------------|
| 1             | 386.03         | 3.2118 | 0.8230 | H $\rightarrow$ L (69%) |

## 4-2. Excited states diagram

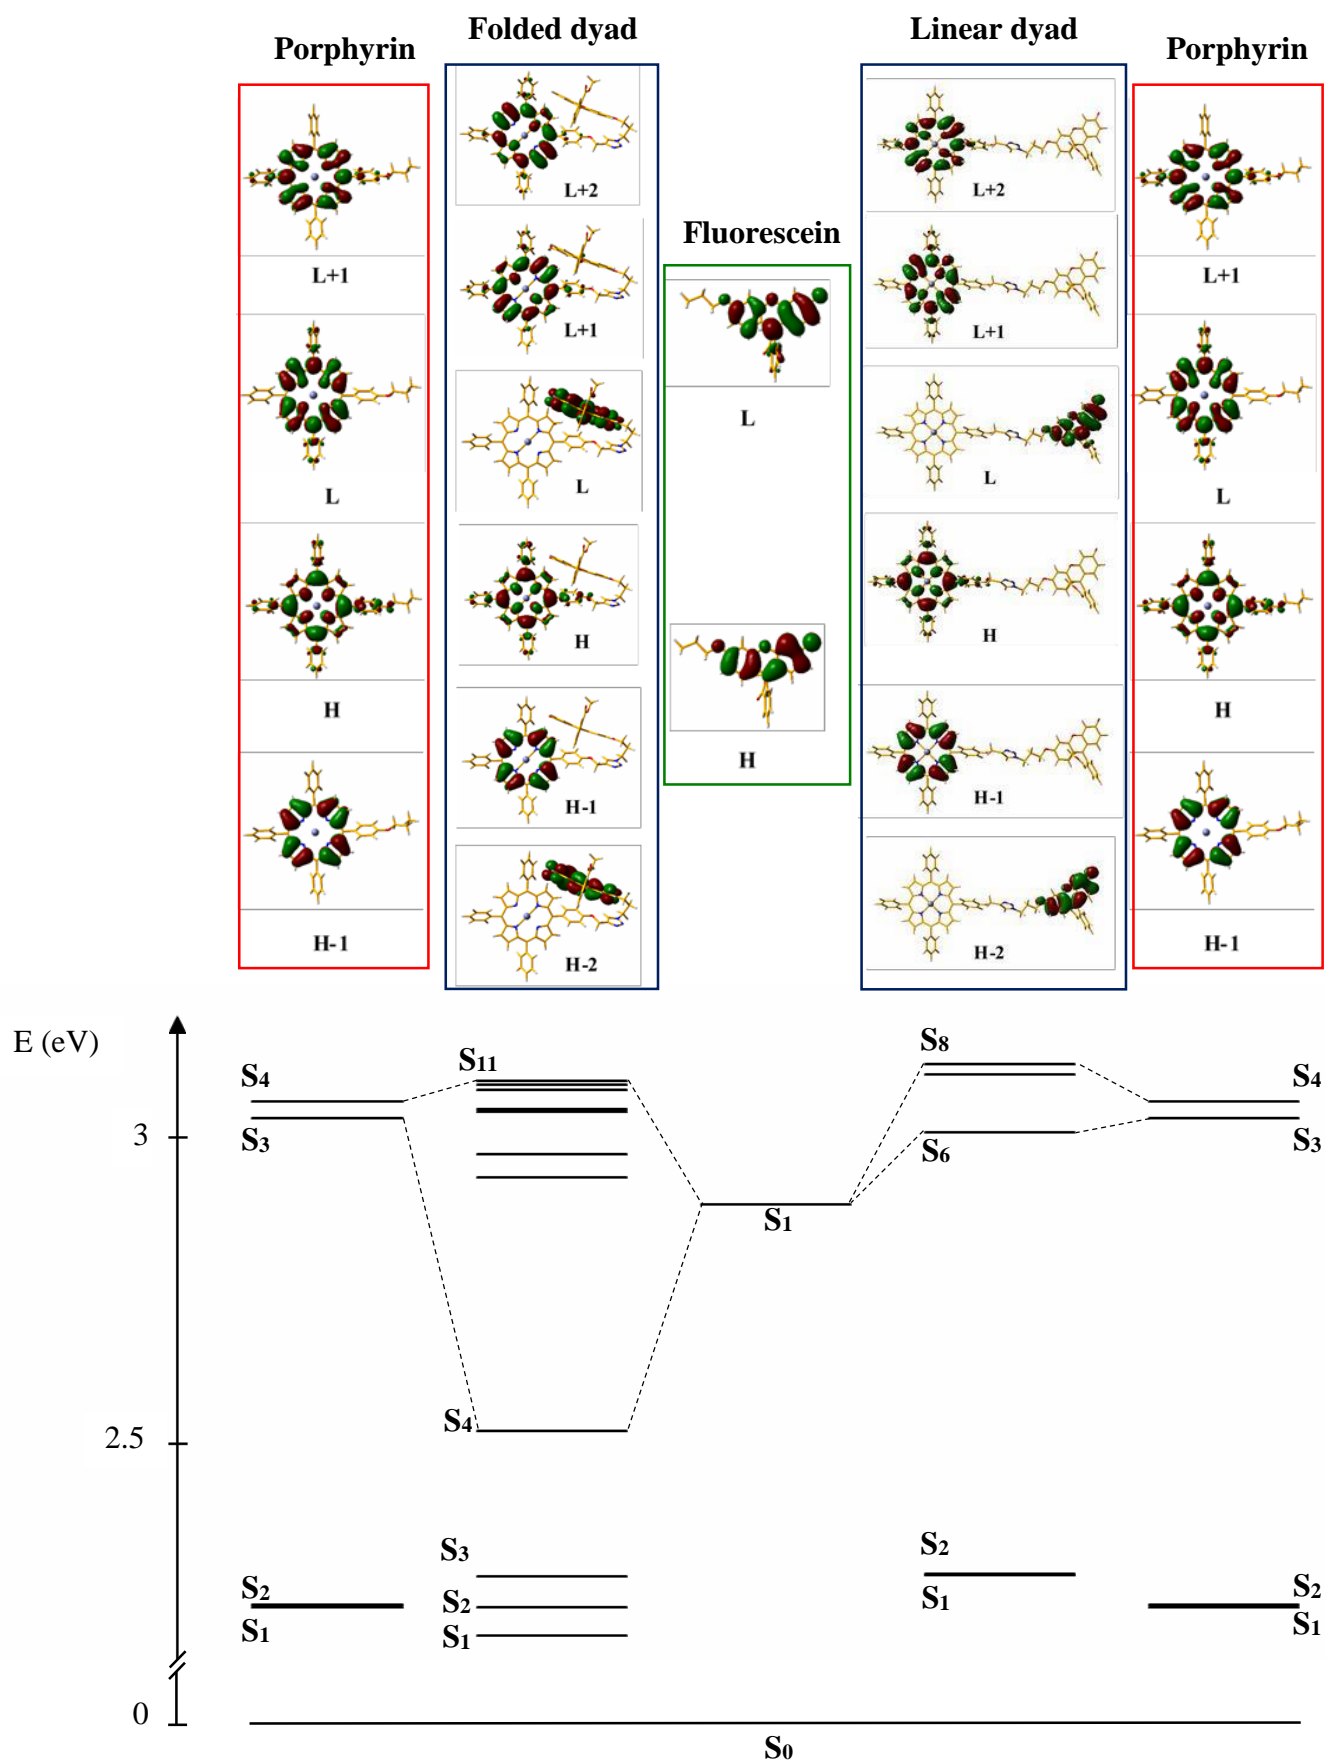

**Figure 4:** Molecular orbitals and excited states involved in dyad 1 and reference compounds 2 and 3 with B3LYP functionals.

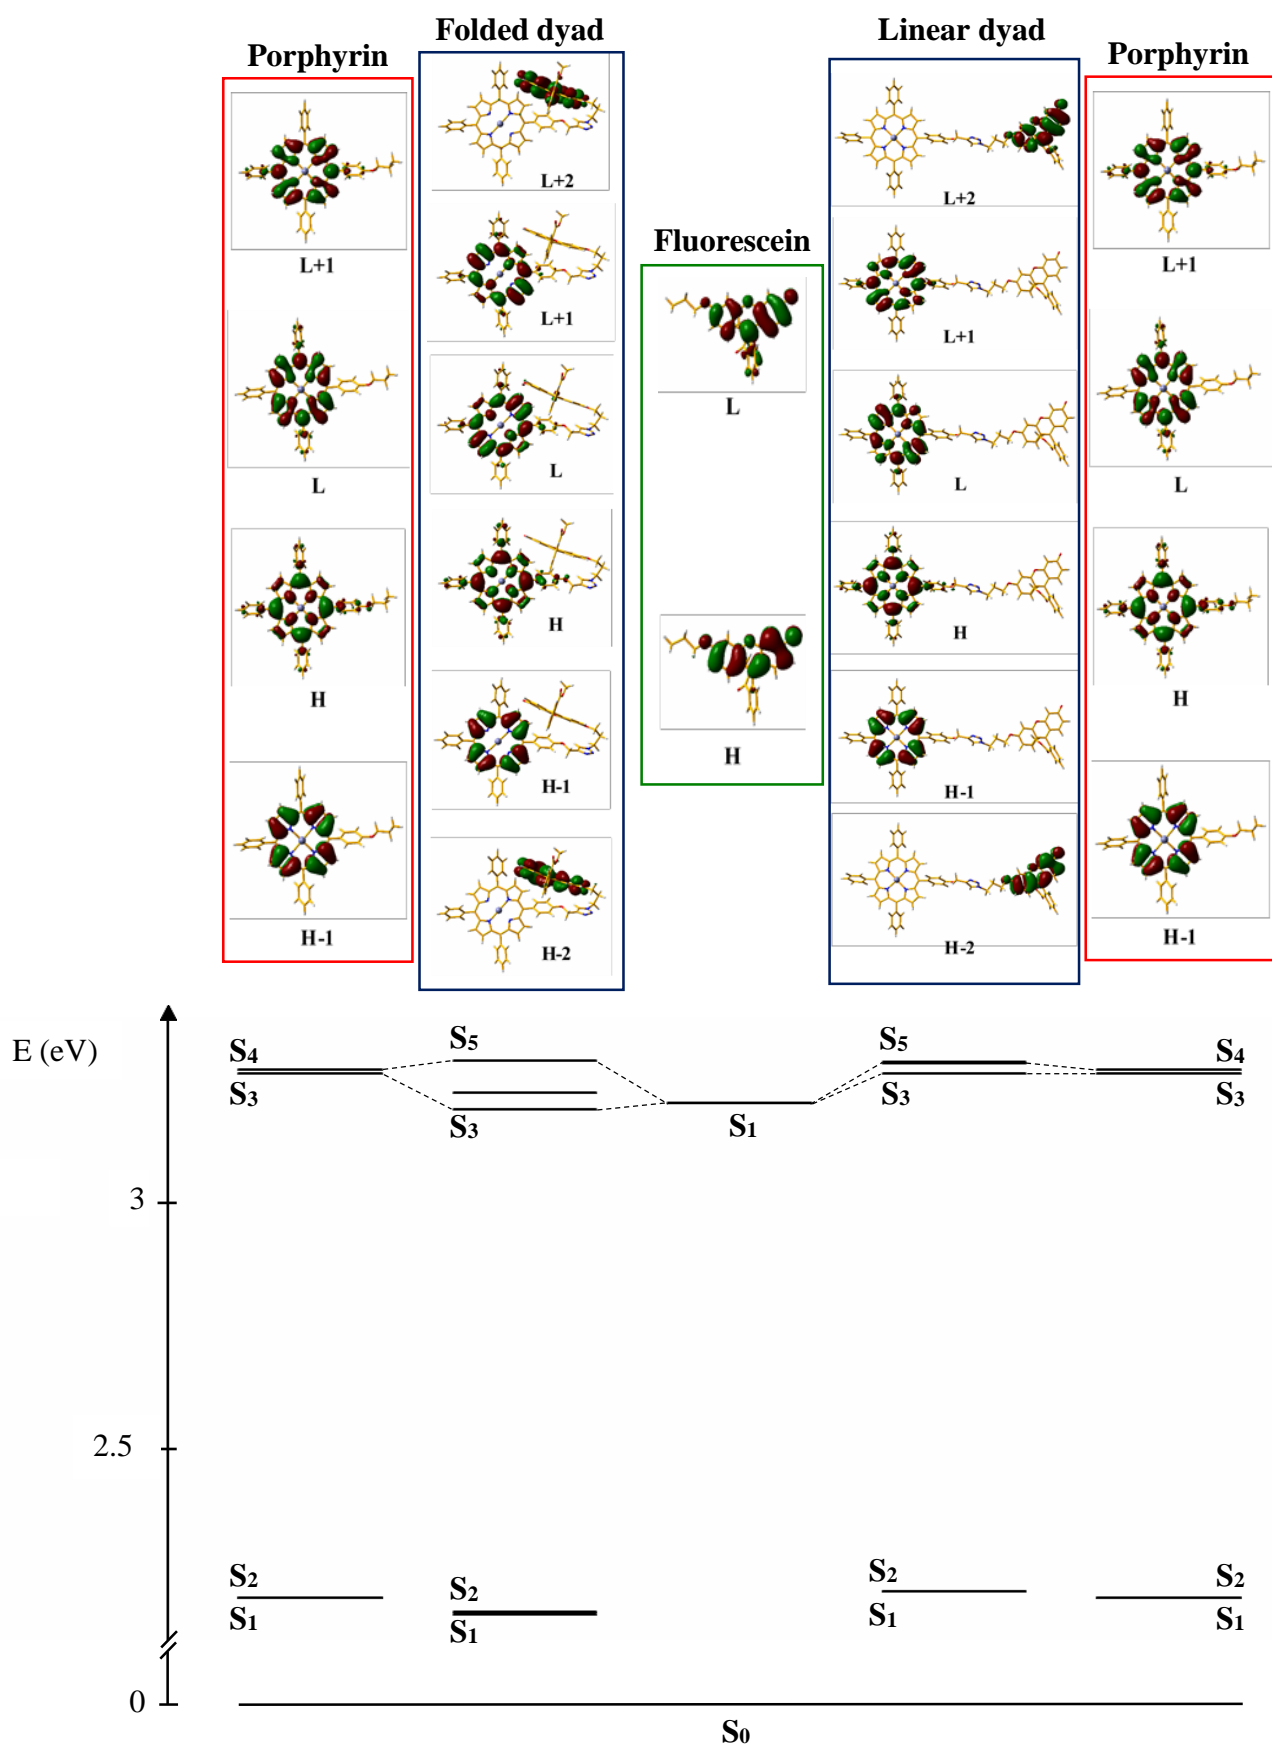

**Figure 5:** Molecular orbitals and excited states involved in dyad 1 and reference compounds 2 and 3 with  $\omega$ B97XD functionals.

## 5. CT state between porphyrin and fluorescein patterns (B3LYP functional)

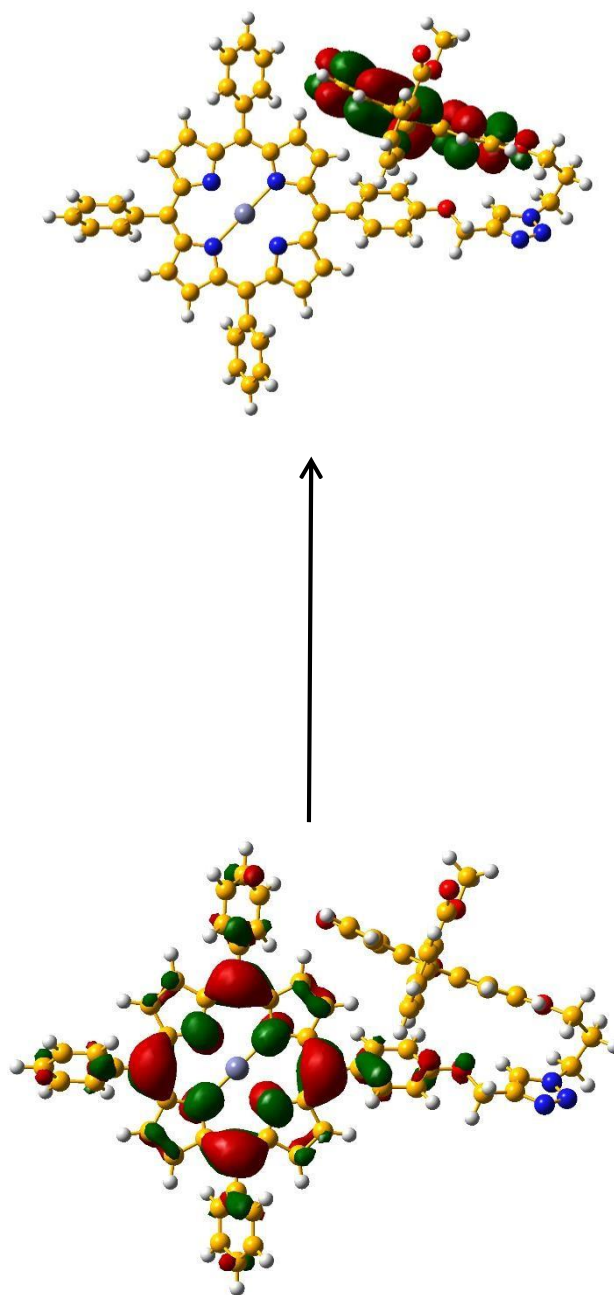

**Figure 6:** Internal charge transfer between porphyrin and fluorescein patterns in the  $S_0 \rightarrow S_1$  transition, with B3LYP functional.

## 6. Computational data

All calculations were performed with GaussianG09<sup>1</sup>. DFT and TD-DFT calculations were obtained in chloroform, which was described with PCM method.

### 6-1. Ground states

#### Compound 1 (linear form) ground state configuration (DFT- $\omega$ B97XD/6-31+G(d,p))

Charge=0, Multiplicity=1

Cartesian coordinates (Angströms)

|   |             |             |             |
|---|-------------|-------------|-------------|
| N | 6.65768900  | 1.48101300  | -0.04781700 |
| C | 6.80728700  | 2.83903500  | 0.00136300  |
| C | 5.33493500  | 1.22290600  | -0.28026100 |
| C | 5.52267100  | 3.46831100  | -0.20735100 |
| C | 4.61428900  | 2.47286400  | -0.37136300 |
| C | 8.01578500  | 3.52739100  | 0.20837600  |
| C | 9.27678400  | 2.93434300  | 0.38999700  |
| N | 9.54323900  | 1.59323800  | 0.36479100  |
| C | 10.49687700 | 3.65841900  | 0.66980100  |
| C | 10.87923200 | 1.43737100  | 0.61094600  |
| C | 11.48360900 | 2.73650200  | 0.80556700  |
| C | 11.56385700 | 0.21307700  | 0.70260300  |
| C | 10.98203000 | -1.06176500 | 0.59087900  |
| N | 9.65690200  | -1.32015600 | 0.37561800  |
| C | 11.70221000 | -2.31188300 | 0.68897000  |
| C | 9.50512500  | -2.67883100 | 0.34213200  |
| C | 10.79063900 | -3.30753400 | 0.54783500  |
| C | 8.29614400  | -3.36669600 | 0.14291600  |
| C | 7.03694000  | -2.77289200 | -0.05303200 |
| N | 6.77034800  | -1.43198200 | -0.03494900 |
| C | 5.82322400  | -3.49751800 | -0.35457400 |
| C | 5.43978900  | -1.27602100 | -0.31030200 |
| C | 4.84046500  | -2.57540800 | -0.51716400 |
| C | 4.75578500  | -0.05115500 | -0.41376700 |
| C | 7.95384200  | 5.02102500  | 0.24161500  |
| C | 8.52463500  | 5.77864200  | -0.78613100 |
| C | 7.32481200  | 5.68473700  | 1.29986900  |
| C | 8.46696900  | 7.16954900  | -0.75722000 |
| C | 7.26574400  | 7.07549900  | 1.32953200  |
| C | 7.83683400  | 7.82137500  | 0.30060200  |
| C | 3.29544800  | -0.11773400 | -0.72111300 |
| C | 2.38432800  | -0.64883800 | 0.20174900  |
| C | 2.80375500  | 0.32069700  | -1.95008900 |
| C | 1.03626700  | -0.75308500 | -0.10188600 |
| C | 1.45054700  | 0.22659600  | -2.27135200 |
| C | 0.56261400  | -0.32391400 | -1.34636800 |
| C | 8.35302700  | -4.86072300 | 0.12786400  |
| C | 7.77084500  | -5.60209700 | 1.16110000  |

|   |             |             |             |
|---|-------------|-------------|-------------|
| C | 8.98621400  | -5.54115400 | -0.91717700 |
| C | 7.82239500  | -6.99344400 | 1.15134300  |
| C | 9.03900700  | -6.93247000 | -0.92779300 |
| C | 8.45722700  | -7.66198000 | 0.10684500  |
| C | 13.03625500 | 0.27448900  | 0.95506800  |
| C | 13.90605300 | 0.76224300  | -0.02562800 |
| C | 13.56793200 | -0.15023700 | 2.17715600  |
| C | 15.27686200 | 0.82453700  | 0.20976100  |
| C | 14.93867200 | -0.09033000 | 2.41303700  |
| C | 15.79681200 | 0.39746800  | 1.42977500  |
| O | -0.76887900 | -0.49147300 | -1.56262800 |
| H | 5.34213400  | 4.53367900  | -0.22661300 |
| H | 3.55146000  | 2.57359400  | -0.53883600 |
| H | 10.58095500 | 4.73150800  | 0.76651300  |
| H | 12.52524900 | 2.91507800  | 1.03133000  |
| H | 12.76631600 | -2.41274300 | 0.84781200  |
| H | 10.96988900 | -4.37278300 | 0.57973800  |
| H | 5.74114300  | -4.57079900 | -0.45081700 |
| H | 3.80520200  | -2.75581800 | -0.76875700 |
| H | 9.01280100  | 5.27025600  | -1.61293100 |
| H | 6.88199500  | 5.10297700  | 2.10346300  |
| H | 8.91190800  | 7.74362400  | -1.56460600 |
| H | 6.77651300  | 7.57611500  | 2.15987100  |
| H | 2.74400400  | -0.99248200 | 1.16749000  |
| H | 3.49223800  | 0.73506900  | -2.68104900 |
| H | 0.33172000  | -1.16944600 | 0.61088000  |
| H | 1.11427100  | 0.57554300  | -3.24076000 |
| H | 7.27874900  | -5.08046500 | 1.97727000  |
| H | 9.43717100  | -4.97232800 | -1.72546300 |
| H | 7.36899500  | -7.55458700 | 1.96310500  |
| H | 9.53176900  | -7.44626500 | -1.74793200 |
| H | 13.50002800 | 1.09355100  | -0.97733900 |
| H | 12.89753600 | -0.52570300 | 2.94521400  |
| H | 15.94007100 | 1.20341700  | -0.56226500 |
| H | 15.33647300 | -0.42200200 | 3.36761500  |
| C | -1.28392800 | -0.14092700 | -2.83211200 |
| H | -1.17985500 | 0.93971400  | -3.00081600 |
| H | -0.74091200 | -0.66052700 | -3.63225700 |
| C | -2.72098700 | -0.54650200 | -2.86244500 |
| C | -3.55004700 | -0.94544900 | -1.84230100 |
| H | -3.40074500 | -1.07304000 | -0.78251200 |
| N | -4.72518300 | -1.20577000 | -2.45914100 |
| N | -4.63806600 | -0.97595600 | -3.77288000 |
| N | -3.42292300 | -0.57942500 | -4.02414700 |
| C | -5.99117900 | -1.63096000 | -1.88331500 |
| H | -5.77159100 | -2.10792200 | -0.92505800 |
| H | -6.40823700 | -2.38781900 | -2.55272000 |
| C | -6.95294700 | -0.45565000 | -1.71821800 |
| H | -6.53327200 | 0.27539600  | -1.01922900 |
| H | -7.08210900 | 0.04010400  | -2.68523200 |

|    |              |             |             |
|----|--------------|-------------|-------------|
| C  | -8.30744800  | -0.92330200 | -1.21385500 |
| H  | -8.74935700  | -1.64603300 | -1.91229200 |
| H  | -8.22070000  | -1.40030000 | -0.22852300 |
| O  | -9.13171600  | 0.23066200  | -1.12392800 |
| C  | -10.42446300 | 0.08794300  | -0.77345900 |
| C  | -11.02331100 | -1.13701300 | -0.42932900 |
| C  | -11.17858900 | 1.26035200  | -0.77195600 |
| C  | -12.36308000 | -1.16676200 | -0.08900300 |
| H  | -10.45632000 | -2.05951800 | -0.42865200 |
| C  | -12.51891800 | 1.20235000  | -0.42724500 |
| H  | -10.72265500 | 2.20478300  | -1.04432900 |
| C  | -13.14775300 | -0.00263500 | -0.07009500 |
| H  | -12.81879700 | -2.11787200 | 0.16528900  |
| O  | -13.19898700 | 2.37396800  | -0.45907500 |
| C  | -14.54676900 | 0.03297200  | 0.29189200  |
| C  | -14.52301400 | 2.43134100  | -0.15260600 |
| C  | -15.22179800 | 1.22126300  | 0.24027800  |
| C  | -15.23610100 | -1.23747800 | 0.65401200  |
| C  | -15.12882100 | 3.64164800  | -0.22502400 |
| C  | -16.61835600 | 1.37513000  | 0.59618900  |
| C  | -14.99387300 | -1.93426100 | 1.85211800  |
| C  | -16.12051000 | -1.78591800 | -0.27835200 |
| C  | -16.53645000 | 3.79552200  | 0.10353800  |
| H  | -14.56716400 | 4.51918400  | -0.52522100 |
| C  | -17.23692500 | 2.56943000  | 0.53043100  |
| H  | -17.15901700 | 0.49302300  | 0.92321900  |
| C  | -15.62967600 | -3.15589300 | 2.08267800  |
| C  | -14.06712200 | -1.45537100 | 2.92423800  |
| C  | -16.76126600 | -2.99626700 | -0.03162900 |
| H  | -16.29850500 | -1.25680400 | -1.20947100 |
| O  | -17.12101300 | 4.88102200  | 0.04239200  |
| H  | -18.28340400 | 2.67774900  | 0.79787000  |
| C  | -16.51478400 | -3.68523400 | 1.15206900  |
| H  | -15.42122500 | -3.67912300 | 3.00959300  |
| O  | -13.56137600 | -2.18693700 | 3.74876300  |
| O  | -13.87038900 | -0.13795400 | 2.88594500  |
| H  | -17.44901200 | -3.39930800 | -0.76816600 |
| H  | -17.00793400 | -4.63136900 | 1.34914900  |
| C  | -12.92876700 | 0.38943300  | 3.82294700  |
| H  | -12.87263400 | 1.45561000  | 3.60924800  |
| H  | -13.27421100 | 0.22058600  | 4.84504900  |
| H  | -11.95305900 | -0.08164400 | 3.68406000  |
| H  | 8.49898600   | -8.74710900 | 0.09915200  |
| H  | 16.86590200  | 0.44641900  | 1.61365900  |
| H  | 7.79044900   | 8.90609700  | 0.32322900  |
| Zn | 8.15714300   | 0.08049800  | 0.16495000  |



**Compound 1 (folded form) ground state configuration (DFT- $\omega$ B97XD/6-31+G(d,p))**

Charge=0, Multiplicity=1

Cartesian coordinates (Angströms)

|   |             |             |             |
|---|-------------|-------------|-------------|
| N | 2.30164800  | -0.71947900 | 0.19952800  |
| C | 2.17264100  | -2.07955900 | 0.22236700  |
| C | 1.06260100  | -0.18929800 | 0.42408100  |
| C | 0.80982300  | -2.42203100 | 0.54552800  |
| C | 0.12276600  | -1.25753200 | 0.65990500  |
| C | 3.18586300  | -3.01342200 | -0.06789300 |
| C | 4.54402800  | -2.70487700 | -0.25421200 |
| N | 5.10231100  | -1.46365100 | -0.11023900 |
| C | 5.57416400  | -3.64976800 | -0.62261900 |
| C | 6.44189500  | -1.58718200 | -0.34507400 |
| C | 6.74444800  | -2.96301500 | -0.67168100 |
| C | 7.38479700  | -0.54337200 | -0.29641800 |
| C | 7.09089300  | 0.81523600  | -0.08641500 |
| N | 5.84076600  | 1.35850500  | 0.02092000  |
| C | 8.07743100  | 1.86408100  | 0.05193000  |
| C | 5.99058000  | 2.70724500  | 0.19265800  |
| C | 7.40082900  | 3.02750600  | 0.22634000  |
| C | 4.94788000  | 3.64261700  | 0.30395600  |
| C | 3.57224000  | 3.34023200  | 0.32359000  |
| N | 3.02600800  | 2.08925100  | 0.36780500  |
| C | 2.51331300  | 4.32097800  | 0.25468700  |
| C | 1.66432500  | 2.23320500  | 0.34300500  |
| C | 1.33905300  | 3.63908400  | 0.25218800  |
| C | 0.73362500  | 1.17967500  | 0.40274900  |
| C | 2.75188600  | -4.43208500 | -0.23306700 |
| C | 3.25175000  | -5.45052800 | 0.58577100  |
| C | 1.80721100  | -4.76126200 | -1.21392200 |
| C | 2.81951400  | -6.76487000 | 0.42599700  |
| C | 1.37151200  | -6.07308100 | -1.37189000 |
| C | 1.87791400  | -7.07969700 | -0.55180000 |
| C | -0.71751500 | 1.52073700  | 0.36604600  |
| C | -1.52254300 | 1.02693500  | -0.67383600 |
| C | -1.31428200 | 2.35542100  | 1.31247800  |
| C | -2.85449700 | 1.38729800  | -0.78450700 |
| C | -2.65511000 | 2.72925600  | 1.21524600  |
| C | -3.42333100 | 2.26027600  | 0.14891300  |
| C | 5.32409100  | 5.08585100  | 0.39129000  |
| C | 5.04121900  | 5.82118500  | 1.54766300  |
| C | 5.95759700  | 5.72960200  | -0.67725900 |
| C | 5.38512500  | 7.16719800  | 1.63524100  |
| C | 6.30157000  | 7.07603400  | -0.59128400 |
| C | 6.01646900  | 7.79833700  | 0.56550800  |
| C | 8.82000500  | -0.90695700 | -0.49678400 |
| C | 9.49168400  | -1.70699600 | 0.43388100  |
| C | 9.51792500  | -0.45054000 | -1.62020200 |
| C | 10.83059800 | -2.03992200 | 0.24719400  |

|   |              |             |             |
|---|--------------|-------------|-------------|
| C | 10.85643100  | -0.78306100 | -1.80837000 |
| C | 11.51661900  | -1.57838000 | -0.87415800 |
| O | -4.72142300  | 2.58513700  | -0.06598400 |
| H | 0.43166700   | -3.42367600 | 0.67950100  |
| H | -0.92359000  | -1.13485400 | 0.89635500  |
| H | 5.41796200   | -4.69907600 | -0.82839500 |
| H | 7.72269700   | -3.34735200 | -0.92346400 |
| H | 9.14864600   | 1.72236200  | 0.03113200  |
| H | 7.81671000   | 4.01382800  | 0.37510400  |
| H | 2.65302200   | 5.39038500  | 0.18505400  |
| H | 0.34427500   | 4.05390800  | 0.17699800  |
| H | 3.97501400   | -5.20538900 | 1.35841900  |
| H | 1.39953000   | -3.98560800 | -1.85583600 |
| H | 3.21227600   | -7.54215800 | 1.07497700  |
| H | 0.62944900   | -6.29180400 | -2.13386000 |
| H | -1.08855900  | 0.36506800  | -1.41736300 |
| H | -0.72186700  | 2.72990300  | 2.14222000  |
| H | -3.46524900  | 1.02677500  | -1.60568100 |
| H | -3.08204000  | 3.37840800  | 1.97150300  |
| H | 4.55178100   | 5.32863900  | 2.38320900  |
| H | 6.17497600   | 5.16875800  | -1.58192700 |
| H | 5.16266600   | 7.72179900  | 2.54211500  |
| H | 6.78826100   | 7.56190300  | -1.43181900 |
| H | 8.95857500   | -2.06379000 | 1.31065000  |
| H | 9.00161200   | 0.16719400  | -2.34959200 |
| H | 11.33963600  | -2.65767100 | 0.98117000  |
| H | 11.38229500  | -0.42267000 | -2.68751700 |
| C | -5.27619800  | 3.67323700  | 0.65068700  |
| H | -5.45824200  | 3.40629000  | 1.69957200  |
| H | -4.58713500  | 4.52832400  | 0.63146200  |
| C | -6.56305200  | 4.00602100  | -0.02870700 |
| C | -6.98289800  | 3.63412900  | -1.28120300 |
| H | -6.53434100  | 3.02888900  | -2.05146100 |
| N | -8.21447400  | 4.17722400  | -1.39229600 |
| N | -8.54556400  | 4.84222700  | -0.27855900 |
| N | -7.54212500  | 4.74640600  | 0.55076200  |
| C | -9.22005500  | 3.88114000  | -2.40400800 |
| H | -8.68702300  | 3.46193400  | -3.25807900 |
| H | -9.68875500  | 4.81675300  | -2.71387100 |
| C | -10.26877800 | 2.89142200  | -1.87349400 |
| H | -10.99601000 | 3.42182700  | -1.25092800 |
| H | -10.80795400 | 2.46567300  | -2.72529500 |
| C | -9.65745900  | 1.79355500  | -1.02009700 |
| H | -9.19735700  | 2.24494900  | -0.13586700 |
| H | -10.41850700 | 1.07919400  | -0.68784500 |
| O | -8.67390800  | 1.11539800  | -1.79865800 |
| C | -7.67410500  | 0.45126500  | -1.18157800 |
| C | -7.54711300  | 0.32160900  | 0.21309500  |
| C | -6.72371300  | -0.11889100 | -2.02879000 |
| C | -6.46520800  | -0.35831600 | 0.73550300  |

|    |             |             |             |
|----|-------------|-------------|-------------|
| H  | -8.28443000 | 0.73628700  | 0.88775600  |
| C  | -5.66337500 | -0.82178000 | -1.47843200 |
| H  | -6.82373300 | -0.02610800 | -3.10386700 |
| C  | -5.49974500 | -0.95251600 | -0.09025800 |
| H  | -6.36752900 | -0.45571700 | 1.81161400  |
| O  | -4.78029500 | -1.37592700 | -2.34839000 |
| C  | -4.40022800 | -1.74148800 | 0.40101000  |
| C  | -3.78160800 | -2.19397600 | -1.91224500 |
| C  | -3.58578900 | -2.38360300 | -0.48873200 |
| C  | -4.11791800 | -1.76513000 | 1.86572800  |
| C  | -2.99293300 | -2.78408700 | -2.84575000 |
| C  | -2.54246700 | -3.30520300 | -0.09737300 |
| C  | -4.63892500 | -2.69824600 | 2.77824800  |
| C  | -3.26195500 | -0.76437200 | 2.33395100  |
| C  | -1.92562700 | -3.69222200 | -2.45490100 |
| H  | -3.15666500 | -2.59837700 | -3.90135300 |
| C  | -1.78492900 | -3.94051600 | -1.01077100 |
| H  | -2.39697900 | -3.48588200 | 0.96350300  |
| C  | -4.27854200 | -2.61429700 | 4.12664700  |
| C  | -5.57094800 | -3.80991200 | 2.41359900  |
| C  | -2.91236300 | -0.69029500 | 3.67738800  |
| H  | -2.87007600 | -0.03600400 | 1.63103800  |
| O  | -1.17734900 | -4.23840900 | -3.27407500 |
| H  | -1.01860900 | -4.65016700 | -0.71643400 |
| C  | -3.42112500 | -1.62068300 | 4.57921900  |
| H  | -4.68569300 | -3.34927600 | 4.81219200  |
| O  | -5.95201400 | -4.65190200 | 3.19921300  |
| O  | -5.94860700 | -3.77424900 | 1.13635200  |
| H  | -2.23967400 | 0.09333800  | 4.01140300  |
| H  | -3.15327600 | -1.57224800 | 5.62953500  |
| C  | -6.83228500 | -4.81091300 | 0.70472600  |
| H  | -7.00681700 | -4.62036700 | -0.35302300 |
| H  | -6.36788900 | -5.78905700 | 0.84641100  |
| H  | -7.77018300 | -4.76749800 | 1.26260400  |
| H  | 12.56141400 | -1.83620700 | -1.01958400 |
| H  | 6.28346800  | 8.84877100  | 0.63330900  |
| H  | 1.53848300  | -8.10431300 | -0.67205200 |
| Zn | 4.07127900  | 0.31838100  | 0.11538200  |

**Compound 2 ground state configuration (DFT- $\omega$ B97XD/6-31+G(d,p))**

Charge=0, Multiplicity=1

Cartesian coordinates (Angströms)

|   |             |             |             |
|---|-------------|-------------|-------------|
| N | 0.52784600  | -1.50593900 | 0.05322400  |
| C | 0.27896900  | -2.85793300 | 0.05122600  |
| C | 1.89207600  | -1.33565500 | 0.08113400  |
| C | 1.53935400  | -3.57105000 | 0.06573600  |
| C | 2.53019400  | -2.63555300 | 0.09704000  |
| C | -0.99706300 | -3.46583400 | 0.03678500  |
| C | -2.23456400 | -2.78358400 | 0.00913700  |
| N | -2.40474900 | -1.42060800 | -0.05258500 |
| C | -3.53346800 | -3.41997100 | 0.08045200  |
| C | -3.75650100 | -1.17098700 | -0.03275200 |
| C | -4.46888500 | -2.42886600 | 0.05470000  |
| C | -4.36526900 | 0.10449900  | -0.06354400 |
| C | -3.68232700 | 1.34228200  | -0.06145800 |
| N | -2.32104100 | 1.51244200  | 0.02770200  |
| C | -4.31472300 | 2.63967900  | -0.18094500 |
| C | -2.06889500 | 2.86305600  | -0.01904000 |
| C | -3.32299400 | 3.57439200  | -0.15458100 |
| C | -0.79416200 | 3.47146300  | 0.01936400  |
| C | 0.44288900  | 2.79007700  | 0.06684500  |
| N | 0.61261500  | 1.42566600  | 0.07870500  |
| C | 1.74189800  | 3.42881800  | 0.10673200  |
| C | 1.96443800  | 1.17668400  | 0.11045300  |
| C | 2.67706700  | 2.43739900  | 0.12020700  |
| C | 2.57515700  | -0.09835900 | 0.10991800  |
| C | -1.04392700 | -4.96429400 | 0.06466200  |
| C | -1.50966800 | -5.68791700 | -1.04537500 |
| C | -0.62667400 | -5.67696600 | 1.20084900  |
| C | -1.55534600 | -7.08319400 | -1.02123700 |
| C | -0.67318800 | -7.07215800 | 1.22651900  |
| C | -1.13720600 | -7.77998500 | 0.11506300  |
| C | 4.07281600  | -0.13935700 | 0.14051700  |
| C | 4.78868300  | 0.27961200  | 1.27734400  |
| C | 4.80914800  | -0.59085600 | -0.96217900 |
| C | 6.17759700  | 0.24989000  | 1.30680900  |
| C | 6.20652600  | -0.62707700 | -0.94941100 |
| C | 6.90050700  | -0.20234200 | 0.19109900  |
| C | -0.75299500 | 4.97032400  | -0.00329300 |
| C | -0.25075000 | 5.66103800  | -1.11836200 |
| C | -1.22028700 | 5.71599000  | 1.09130100  |
| C | -0.21555400 | 7.05670100  | -1.13812800 |
| C | -1.18423700 | 7.11164400  | 1.07311400  |
| C | -0.68172200 | 7.78661200  | -0.04196500 |
| C | -5.86276400 | 0.14831900  | -0.09843500 |
| C | -6.57156200 | -0.33946700 | -1.20892600 |
| C | -6.59118900 | 0.67769000  | 0.97988600  |
| C | -7.96672300 | -0.29828100 | -1.24106300 |

|    |             |             |             |
|----|-------------|-------------|-------------|
| C  | -7.98638900 | 0.71730700  | 0.94961700  |
| C  | -8.67888500 | 0.22975300  | -0.16142000 |
| O  | 8.25732300  | -0.19083500 | 0.31606200  |
| H  | 1.65225800  | -4.64539900 | 0.05690300  |
| H  | 3.59588600  | -2.80953400 | 0.12802100  |
| H  | -3.70691000 | -4.48359200 | 0.15674600  |
| H  | -5.54231200 | -2.53906100 | 0.10735400  |
| H  | -5.37576300 | 2.81228800  | -0.28848300 |
| H  | -3.42985700 | 4.64644700  | -0.23539100 |
| H  | 1.91621600  | 4.49494000  | 0.11727900  |
| H  | 3.75133700  | 2.54992500  | 0.13467600  |
| H  | -1.83084000 | -5.14999900 | -1.93308400 |
| H  | -0.27122600 | -5.13026200 | 2.06990400  |
| H  | -1.91439600 | -7.62506400 | -1.89219800 |
| H  | -0.35053500 | -7.60501300 | 2.11705800  |
| H  | -1.17303900 | -8.86584100 | 0.13448700  |
| H  | 4.24496100  | 0.62841000  | 2.15097100  |
| H  | 4.28344900  | -0.91524700 | -1.85611900 |
| H  | 6.72600500  | 0.57046700  | 2.18745600  |
| H  | 6.73589000  | -0.97910800 | -1.82717000 |
| H  | 0.10658300  | 5.09742200  | -1.97577300 |
| H  | -1.60724000 | 5.19461500  | 1.96249900  |
| H  | 0.17240300  | 7.57289100  | -2.01227500 |
| H  | -1.54593300 | 7.67062300  | 1.93208100  |
| H  | -0.65409200 | 8.87277900  | -0.05685700 |
| H  | -6.02150200 | -0.74516700 | -2.05345900 |
| H  | -6.05690000 | 1.05165700  | 1.84883300  |
| H  | -8.49629400 | -0.67552700 | -2.11188300 |
| H  | -8.53166600 | 1.12553500  | 1.79644300  |
| H  | -9.76478000 | 0.26101900  | -0.18568100 |
| C  | 9.05767400  | -0.62495900 | -0.78885600 |
| H  | 8.82559300  | -1.67318700 | -1.02213600 |
| H  | 8.82447300  | -0.01765400 | -1.67527100 |
| C  | 10.52244400 | -0.46865300 | -0.40065700 |
| H  | 10.71535700 | -1.07759500 | 0.49160500  |
| H  | 11.12454800 | -0.89837300 | -1.21170200 |
| C  | 10.93743000 | 0.98466300  | -0.14960700 |
| H  | 10.35078600 | 1.42479800  | 0.66285900  |
| H  | 11.99654500 | 1.04763600  | 0.12296800  |
| H  | 10.78431700 | 1.59823000  | -1.04613200 |
| Zn | -0.89654300 | 0.00313800  | 0.04053400  |

**Compound 3 ground state configuration (DFT- $\omega$ B97XD/6-31+G(d,p))**

Charge=0, Multiplicity=1

Cartesian coordinates (Angströms)

|   |             |             |             |
|---|-------------|-------------|-------------|
| C | 4.28989400  | -1.91861500 | -0.13275300 |
| C | 3.48621400  | -0.85116300 | -0.29474500 |
| C | 2.04014200  | -0.97995000 | -0.31033000 |
| C | 1.51220200  | -2.31894200 | -0.09694300 |
| C | 2.30074300  | -3.40625700 | 0.06437500  |
| C | 3.75322000  | -3.28452200 | 0.04514800  |
| C | 1.18272000  | 0.07054300  | -0.46687700 |
| C | -0.70153200 | -1.47519800 | -0.20195200 |
| C | -0.24623400 | -0.16561400 | -0.43335300 |
| C | -1.21969100 | 0.82931500  | -0.60579900 |
| H | -0.90773300 | 1.84978500  | -0.80175300 |
| C | -2.57343900 | 0.54857900  | -0.53178200 |
| C | -2.99282100 | -0.77042700 | -0.28550000 |
| C | -2.04983900 | -1.78448300 | -0.12495300 |
| H | 5.37028700  | -1.81935700 | -0.11733700 |
| H | 3.90886500  | 0.14122000  | -0.41165400 |
| H | 1.86695800  | -4.38713100 | 0.21887500  |
| H | -3.28881000 | 1.34933800  | -0.66670900 |
| H | -2.36747200 | -2.80420200 | 0.05613000  |
| O | 0.16227300  | -2.50659800 | -0.04337400 |
| O | -4.28326200 | -1.15131200 | -0.19152400 |
| O | 4.50237200  | -4.25140000 | 0.18022600  |
| C | 1.68004200  | 1.45332100  | -0.71447200 |
| C | 1.53961200  | 2.49782000  | 0.21629700  |
| C | 2.25296900  | 1.73416800  | -1.95817800 |
| C | 1.96344600  | 3.78692700  | -0.11423400 |
| C | 2.69071100  | 3.01706500  | -2.27263200 |
| H | 2.34798200  | 0.93284400  | -2.68440200 |
| C | 2.54578200  | 4.04798400  | -1.34829200 |
| H | 1.82823700  | 4.57670900  | 0.61698200  |
| H | 3.14010500  | 3.20845500  | -3.24166400 |
| H | 2.88113900  | 5.05157200  | -1.58775800 |
| C | 0.92046500  | 2.32589200  | 1.56808100  |
| O | 0.35329000  | 3.21746300  | 2.16172400  |
| O | 1.07049500  | 1.09134100  | 2.05288200  |
| C | -5.30606800 | -0.17329300 | -0.33960400 |
| H | -5.22681500 | 0.29814000  | -1.32904100 |
| H | -5.18658200 | 0.60594300  | 0.42614900  |
| C | -6.64630800 | -0.86746100 | -0.18572800 |
| H | -6.72572300 | -1.65282100 | -0.94463500 |
| H | -6.67714000 | -1.36084400 | 0.79129500  |
| C | -7.80493300 | 0.11996000  | -0.31850400 |
| H | -8.76459500 | -0.39051600 | -0.20567800 |
| H | -7.75231500 | 0.90080500  | 0.44759600  |
| H | -7.80200200 | 0.60962400  | -1.29811600 |
| C | 0.40947300  | 0.81348300  | 3.29028900  |

|   |             |             |            |
|---|-------------|-------------|------------|
| H | 0.78052900  | 1.47324600  | 4.07689400 |
| H | -0.66795100 | 0.95278000  | 3.17589400 |
| H | 0.64108200  | -0.22633100 | 3.51410300 |

## 6-2. Excited states calculations

Absorption spectra calculations for compounds **1**, **2** and **3** were performed using B3LYP, CAM-B3LYP and wB97XD methods, and 6-31+G(d,p) as basis set.

### Compound 1 (linear form) absorption spectrum calculation and input keywords

```
#p scrf=(solvent=chloroform) geom=connectivity gfinput gfprint iop(6/7=3) pop=full  
pseudo=read td=(nstates=30)
```

Charge=0, Multiplicity=1

Cartesian coordinates (Angströms)

|   |             |             |             |
|---|-------------|-------------|-------------|
| N | -4.76903200 | 1.47531700  | 0.32992800  |
| C | -4.97688400 | 2.82510000  | 0.29139400  |
| C | -3.44562200 | 1.27077200  | 0.60592800  |
| C | -3.72778900 | 3.50749900  | 0.54917400  |
| C | -2.78338900 | 2.54983400  | 0.73551300  |
| C | -6.21116500 | 3.46094700  | 0.06148200  |
| C | -7.44248000 | 2.81542700  | -0.14927500 |
| N | -7.65220200 | 1.46455400  | -0.13309300 |
| C | -8.68709300 | 3.48747100  | -0.45475700 |
| C | -8.97314100 | 1.25109700  | -0.41074600 |
| C | -9.62964600 | 2.52421500  | -0.61527200 |
| C | -9.59908000 | -0.00306600 | -0.52722600 |
| C | -8.96404200 | -1.25340400 | -0.41512300 |
| N | -7.63403700 | -1.45667500 | -0.17621600 |
| C | -9.62646600 | -2.53348400 | -0.54295600 |
| C | -7.42121300 | -2.80712800 | -0.16050900 |
| C | -8.67423400 | -3.48991000 | -0.39870700 |
| C | -6.18428100 | -3.44178200 | 0.04618100  |
| C | -4.95529800 | -2.79626700 | 0.27589900  |
| N | -4.74953700 | -1.44569900 | 0.28596700  |
| C | -3.71664700 | -3.47094200 | 0.59480600  |
| C | -3.43627100 | -1.23317300 | 0.60137800  |
| C | -2.78228700 | -2.50764700 | 0.80153700  |
| C | -2.81513000 | 0.02111400  | 0.74700400  |
| C | -6.21645500 | 4.95537700  | 0.04034700  |
| C | -6.87247600 | 5.67714200  | 1.04232900  |
| C | -5.56591800 | 5.65835300  | -0.98011400 |
| C | -6.88670800 | 7.06845700  | 1.02300300  |
| C | -5.57503600 | 7.04852100  | -1.00182600 |
| C | -6.23842400 | 7.75493600  | -0.00002000 |
| C | -1.36890000 | 0.02243500  | 1.12317200  |
| C | -0.38267700 | -0.43028900 | 0.23682100  |
| C | -0.96696300 | 0.45929400  | 2.38523100  |
| C | 0.95381200  | -0.45451300 | 0.60545000  |
| C | 0.37189800  | 0.44378000  | 2.77214200  |
| C | 1.33784500  | -0.02322000 | 1.87980400  |
| C | -6.17161400 | -4.93635700 | 0.02609000  |
| C | -5.53273400 | -5.62361900 | -1.01087400 |



|   |              |             |             |
|---|--------------|-------------|-------------|
| C | -6.79098900  | -5.67284900 | 1.04158900  |
| C | -5.51955000  | -7.01448900 | -1.03952000 |
| C | -6.77955400  | -7.06330500 | 1.01744700  |
| C | -6.14495100  | -7.73521100 | -0.02531700 |
| C | -11.06558300 | -0.00619400 | -0.81650000 |
| C | -11.98167300 | 0.44656000  | 0.13882500  |
| C | -11.54839000 | -0.46606500 | -2.04644300 |
| C | -13.34706000 | 0.44145000  | -0.12694800 |
| C | -12.91262300 | -0.47533600 | -2.31564700 |
| C | -13.81390200 | -0.02144800 | -1.35517100 |
| O | 2.66694000   | -0.09552200 | 2.15602900  |
| H | -3.59183900  | 4.57903000  | 0.58655800  |
| H | -1.73247100  | 2.69505700  | 0.94142400  |
| H | -8.81784600  | 4.55585600  | -0.55135300 |
| H | -10.67249300 | 2.66120800  | -0.86371000 |
| H | -10.68184300 | -2.68110800 | -0.72235100 |
| H | -8.80773000  | -4.56121500 | -0.44890100 |
| H | -3.58571400  | -4.54097800 | 0.67251700  |
| H | -1.74609600  | -2.64615000 | 1.07553200  |
| H | -7.37242000  | 5.14249600  | 1.84495500  |
| H | -5.05054200  | 5.10828500  | -1.76229500 |
| H | -7.38777800  | 7.62491500  | 1.80800600  |
| H | -5.06093700  | 7.58641100  | -1.79209700 |
| H | -0.66974900  | -0.77217300 | -0.75352800 |
| H | -1.71384900  | 0.81496000  | 3.08919500  |
| H | 1.71627200   | -0.80815200 | -0.08109000 |
| H | 0.63625900   | 0.79172000  | 3.76373600  |
| H | -5.04351000  | -5.06164100 | -1.80134800 |
| H | -7.28002200  | -5.14973900 | 1.85839300  |
| H | -5.01758100  | -7.54310300 | -1.84317600 |
| H | -7.24881500  | -7.62904600 | 1.81586900  |
| H | -11.61839100 | 0.80021900  | 1.09959700  |
| H | -10.84620500 | -0.82094200 | -2.79535300 |
| H | -14.05344500 | 0.77933600  | 0.62418900  |
| H | -13.28239400 | -0.84512500 | -3.26649000 |
| C | 3.08836500   | 0.23103400  | 3.46645500  |
| H | 2.90100900   | 1.29064300  | 3.68416700  |
| H | 2.53685800   | -0.36777600 | 4.20361000  |
| C | 4.54999300   | -0.06353700 | 3.55463600  |
| C | 5.37294000   | -0.72057700 | 2.67184400  |
| H | 5.20676700   | -1.16431300 | 1.70378800  |
| N | 6.57564500   | -0.72904500 | 3.28925600  |
| N | 6.51084300   | -0.11465600 | 4.47311800  |
| N | 5.28222600   | 0.29045300  | 4.64145300  |
| C | 7.84943800   | -1.23983300 | 2.80373200  |
| H | 7.63028200   | -1.98364900 | 2.03457700  |
| H | 8.33355300   | -1.74801300 | 3.64133500  |
| C | 8.72848200   | -0.11495800 | 2.26063000  |
| H | 8.22042300   | 0.38390200  | 1.42864500  |
| H | 8.89382100   | 0.62678500  | 3.04838700  |

|    |              |             |             |
|----|--------------|-------------|-------------|
| C  | 10.06797800  | -0.65280600 | 1.78878500  |
| H  | 10.58931300  | -1.16980100 | 2.60465700  |
| H  | 9.93732300   | -1.35661100 | 0.95728500  |
| O  | 10.83552500  | 0.46788500  | 1.36223500  |
| C  | 12.08844000  | 0.26815000  | 0.91422500  |
| C  | 12.69320800  | -0.99770200 | 0.79341000  |
| C  | 12.79071600  | 1.41929300  | 0.55745500  |
| C  | 13.98596700  | -1.09026700 | 0.31688200  |
| H  | 12.16152500  | -1.90116800 | 1.06390400  |
| C  | 14.08675200  | 1.29809000  | 0.08391100  |
| H  | 12.32739400  | 2.39440500  | 0.65028700  |
| C  | 14.71999300  | 0.05034900  | -0.04783600 |
| H  | 14.44747200  | -2.06715000 | 0.21879600  |
| O  | 14.71974500  | 2.44994700  | -0.25063100 |
| C  | 16.06240900  | 0.01281300  | -0.56504300 |
| C  | 15.98996000  | 2.44287700  | -0.73258800 |
| C  | 16.69021600  | 1.18480600  | -0.89133700 |
| C  | 16.77146900  | -1.29635600 | -0.66331300 |
| C  | 16.54875600  | 3.64044700  | -1.04574700 |
| C  | 18.03619900  | 1.25874900  | -1.41650400 |
| C  | 16.82542300  | -2.07708800 | -1.83122900 |
| C  | 17.43925500  | -1.74000300 | 0.48076000  |
| C  | 17.89859000  | 3.72035000  | -1.57145200 |
| H  | 15.98848200  | 4.55865700  | -0.90735100 |
| C  | 18.60469100  | 2.43798700  | -1.73724100 |
| H  | 18.58161900  | 0.32950700  | -1.54783200 |
| C  | 17.55524400  | -3.26885900 | -1.82858700 |
| C  | 16.14847300  | -1.71915300 | -3.11552600 |
| C  | 18.15170200  | -2.93506100 | 0.47510800  |
| H  | 17.40184700  | -1.13466000 | 1.38130100  |
| O  | 18.43903900  | 4.79493400  | -1.86611500 |
| H  | 19.61450700  | 2.48544900  | -2.13316500 |
| C  | 18.21206800  | -3.70251900 | -0.68474200 |
| H  | 17.59339800  | -3.85030700 | -2.74326000 |
| O  | 16.40767000  | -2.24268000 | -4.17969900 |
| O  | 15.21624700  | -0.78094200 | -2.96616300 |
| H  | 18.66144100  | -3.26085100 | 1.37600300  |
| H  | 18.76750800  | -4.63438100 | -0.69844900 |
| C  | 14.53763400  | -0.35796400 | -4.15174600 |
| H  | 13.83252200  | 0.40429300  | -3.82481200 |
| H  | 15.24925200  | 0.05909200  | -4.86749300 |
| H  | 14.01022700  | -1.19901600 | -4.60648100 |
| H  | -6.13817689  | -8.80497436 | -0.04677557 |
| H  | -14.86395629 | -0.02837100 | -1.56069002 |
| H  | -6.24942506  | 8.82474084  | -0.01724132 |
| Zn | -6.20090500  | 0.00935400  | 0.07699100  |

## Compound 1 (folded form) absorption spectrum calculation and input keywords

#p scrf=(solvent=chloroform) geom=connectivity gfinput gfprint iop(6/7=3) pop=full

pseudo=read td=(nstates=30)

Charge=0, Multiplicity=1

Cartesian coordinates (Angströms)

|   |             |             |             |
|---|-------------|-------------|-------------|
| N | 1.08125900  | -0.72998900 | 0.26426000  |
| C | 0.85722200  | -2.07351800 | 0.34644300  |
| C | -0.11645300 | -0.10140600 | 0.45642500  |
| C | -0.52977400 | -2.30386100 | 0.66986000  |
| C | -1.13189600 | -1.08836800 | 0.73126700  |
| C | 1.81050300  | -3.08774800 | 0.11605100  |
| C | 3.19374600  | -2.88708200 | -0.03189800 |
| N | 3.83816000  | -1.68561300 | 0.09275300  |
| C | 4.16518000  | -3.91674000 | -0.33025000 |
| C | 5.17169700  | -1.91252000 | -0.08562100 |
| C | 5.38392000  | -3.31873600 | -0.35391300 |
| C | 6.18635700  | -0.93571900 | -0.04341000 |
| C | 5.98493800  | 0.45168200  | 0.07553600  |
| N | 4.77491000  | 1.08659000  | 0.08958300  |
| C | 7.03909400  | 1.43701300  | 0.19463800  |
| C | 5.01368900  | 2.43011700  | 0.17824300  |
| C | 6.44168100  | 2.65378200  | 0.25712900  |
| C | 4.03719300  | 3.44135800  | 0.18419000  |
| C | 2.64175000  | 3.23846500  | 0.18813900  |
| N | 2.01091000  | 2.03434200  | 0.30658200  |
| C | 1.65250800  | 4.28189100  | 0.03484900  |
| C | 0.66256200  | 2.26680800  | 0.25445300  |
| C | 0.43421000  | 3.68242500  | 0.06672500  |
| C | -0.34187200 | 1.28594900  | 0.36733700  |
| C | 1.27085100  | -4.47124400 | -0.02936700 |
| C | 1.67955400  | -5.51854900 | 0.80561500  |
| C | 0.31238700  | -4.73809600 | -1.01469900 |
| C | 1.14362000  | -6.79323200 | 0.65967500  |
| C | -0.23288200 | -6.00916000 | -1.15874100 |
| C | 0.18336000  | -7.03952300 | -0.32107100 |
| C | -1.76250800 | 1.73610000  | 0.32130400  |
| C | -2.61504400 | 1.26622900  | -0.69107600 |
| C | -2.27883600 | 2.65638300  | 1.23546600  |
| C | -3.91322900 | 1.73280400  | -0.80968400 |
| C | -3.58470600 | 3.13531000  | 1.13150100  |
| C | -4.39918400 | 2.68794200  | 0.08999000  |
| C | 4.51335300  | 4.85648600  | 0.16704500  |
| C | 4.21954200  | 5.71928300  | 1.22941400  |
| C | 5.24446900  | 5.35313100  | -0.91770600 |
| C | 4.64448100  | 7.04286900  | 1.20949000  |
| C | 5.67263300  | 6.67642800  | -0.94159300 |
| C | 5.37151200  | 7.52323700  | 0.12229900  |
| C | 7.59628100  | -1.41635400 | -0.14867000 |

|   |              |             |             |
|---|--------------|-------------|-------------|
| C | 8.13996800   | -2.25137300 | 0.83397000  |
| C | 8.39789900   | -1.05033200 | -1.23609100 |
| C | 9.45126900   | -2.70460800 | 0.73736000  |
| C | 9.70987400   | -1.50035300 | -1.33650100 |
| C | 10.23852200  | -2.32796300 | -0.34838200 |
| O | -5.66700600  | 3.11062000  | -0.13034000 |
| H | -0.98196100  | -3.26774600 | 0.84573300  |
| H | -2.16791000  | -0.88197400 | 0.95638900  |
| H | 3.94467800   | -4.95945300 | -0.50950100 |
| H | 6.33857100   | -3.78410600 | -0.55402500 |
| H | 8.09777000   | 1.22421000  | 0.23839600  |
| H | 6.92259800   | 3.61600100  | 0.36122700  |
| H | 1.86144600   | 5.33300200  | -0.10478100 |
| H | -0.52997600  | 4.15726500  | -0.04426400 |
| H | 2.41554000   | -5.32827600 | 1.58136500  |
| H | -0.02285500  | -3.94243600 | -1.67348000 |
| H | 1.47247800   | -7.59765800 | 1.31015000  |
| H | -0.98191100  | -6.19320800 | -1.92152500 |
| H | -2.24456300  | 0.54111500  | -1.40972900 |
| H | -1.64951300  | 3.01587000  | 2.04426700  |
| H | -4.55983600  | 1.39114800  | -1.61124000 |
| H | -3.94834000  | 3.84763400  | 1.86321500  |
| H | 3.65091300   | 5.34699100  | 2.07660900  |
| H | 5.46955400   | 4.69725400  | -1.75375800 |
| H | 4.40156600   | 7.70852500  | 2.03131500  |
| H | 6.22245200   | 7.06035000  | -1.79449300 |
| H | 7.52753800   | -2.54594000 | 1.68139500  |
| H | 7.98495500   | -0.41245200 | -2.01223400 |
| H | 9.86310000   | -3.35910900 | 1.49857000  |
| H | 10.32016300  | -1.22414400 | -2.19018400 |
| C | -6.12643300  | 4.26656800  | 0.54869500  |
| H | -6.31116100  | 4.05586200  | 1.60948000  |
| H | -5.37515900  | 5.06485600  | 0.48473000  |
| C | -7.39546000  | 4.66596600  | -0.12895600 |
| C | -7.85467000  | 4.28115200  | -1.36419500 |
| H | -7.45661800  | 3.62441100  | -2.11978500 |
| N | -9.04850500  | 4.90010800  | -1.48215100 |
| N | -9.32136400  | 5.62358400  | -0.39060200 |
| N | -8.31585500  | 5.48967200  | 0.43310400  |
| C | -10.07962700 | 4.63800700  | -2.47883200 |
| H | -9.57874600  | 4.16378400  | -3.32340900 |
| H | -10.49195900 | 5.59135500  | -2.81339900 |
| C | -11.18359200 | 3.73109300  | -1.91373100 |
| H | -11.87323300 | 4.32333700  | -1.30425300 |
| H | -11.75373900 | 3.31657400  | -2.75048800 |
| C | -10.64031900 | 2.62167400  | -1.03008200 |
| H | -10.14546200 | 3.06549500  | -0.16120200 |
| H | -11.44372500 | 1.96833200  | -0.67423100 |
| O | -9.70767600  | 1.85670200  | -1.79340500 |
| C | -8.75619600  | 1.13880600  | -1.16464300 |

|    |             |             |             |
|----|-------------|-------------|-------------|
| C  | -8.62360500 | 1.04450400  | 0.23370100  |
| C  | -7.86256900 | 0.46949700  | -2.00154100 |
| C  | -7.59263400 | 0.30034400  | 0.76890700  |
| H  | -9.32021400 | 1.53578900  | 0.90000500  |
| C  | -6.85462100 | -0.29562900 | -1.43731000 |
| H  | -7.96641000 | 0.53772600  | -3.07807200 |
| C  | -6.68487800 | -0.39423300 | -0.04645900 |
| H  | -7.49163700 | 0.22891900  | 1.84669100  |
| O  | -6.02725100 | -0.94602900 | -2.29577100 |
| C  | -5.64730600 | -1.24978500 | 0.45999500  |
| C  | -5.08724600 | -1.81863700 | -1.84193500 |
| C  | -4.89163900 | -1.98057300 | -0.41701300 |
| C  | -5.35064000 | -1.25110000 | 1.92209900  |
| C  | -4.35029200 | -2.49189400 | -2.76499100 |
| C  | -3.91300600 | -2.96077100 | -0.00721700 |
| C  | -5.86957100 | -2.16786700 | 2.85160600  |
| C  | -4.46903600 | -0.26106400 | 2.36458000  |
| C  | -3.34813800 | -3.45920700 | -2.35569700 |
| H  | -4.51238000 | -2.32327100 | -3.82391100 |
| C  | -3.21080200 | -3.67470900 | -0.90827600 |
| H  | -3.76595900 | -3.12111300 | 1.05655700  |
| C  | -5.47985900 | -2.08177900 | 4.19145000  |
| C  | -6.83039100 | -3.26098000 | 2.50975300  |
| C  | -4.09322200 | -0.18207400 | 3.70098500  |
| H  | -4.07674200 | 0.45412700  | 1.64829600  |
| O  | -2.64400800 | -4.08025700 | -3.16613300 |
| H  | -2.49124600 | -4.42437200 | -0.59579500 |
| C  | -4.59834800 | -1.09818800 | 4.61959100  |
| H  | -5.88437600 | -2.80423200 | 4.89178200  |
| O  | -7.14231100 | -4.14692100 | 3.27884300  |
| O  | -7.32076500 | -3.15252100 | 1.27695900  |
| H  | -3.40360200 | 0.59415800  | 4.01703200  |
| H  | -4.30992600 | -1.04537600 | 5.66412200  |
| C  | -8.22980600 | -4.17341500 | 0.85724000  |
| H  | -8.46188700 | -3.94501900 | -0.18160300 |
| H  | -7.76043700 | -5.15582400 | 0.93817600  |
| H  | -9.13553500 | -4.14767600 | 1.46698000  |
| H  | 11.24825629 | -2.67396222 | -0.42335670 |
| H  | 5.69824977  | 8.54197903  | 0.10477443  |
| H  | -0.23279867 | -8.01931088 | -0.42936537 |
| Zn | 2.92439600  | 0.17357000  | 0.19136700  |

## Compound 2 absorption spectrum calculation and input keywords

#p scrf=(solvent=chloroform) geom=connectivity gfinput gfprint iop(6/7=3) pop=full

pseudo=read td=(nstates=30)

Charge=0, Multiplicity=1

Cartesian coordinates (Angströms)

|   |             |             |             |
|---|-------------|-------------|-------------|
| N | 0.51945400  | -1.50380500 | 0.06922700  |
| C | 0.26645800  | -2.84716700 | 0.07057400  |
| C | 1.87670700  | -1.34171800 | 0.10533700  |
| C | 1.51937700  | -3.56826400 | 0.10136100  |
| C | 2.51037300  | -2.64106800 | 0.13260500  |
| C | -1.00585200 | -3.44460900 | 0.04542700  |
| C | -2.23373600 | -2.76124800 | 0.00489000  |
| N | -2.39573800 | -1.40486100 | -0.05391600 |
| C | -3.53248800 | -3.39441100 | 0.05731200  |
| C | -3.73920500 | -1.15183300 | -0.04781600 |
| C | -4.45969000 | -2.40356000 | 0.02426400  |
| C | -4.33752600 | 0.12020300  | -0.07786000 |
| C | -3.65331400 | 1.34889200  | -0.06525400 |
| N | -2.29902300 | 1.51102900  | 0.02802700  |
| C | -4.28185900 | 2.64647300  | -0.17460200 |
| C | -2.04329700 | 2.85362400  | -0.00782600 |
| C | -3.29052600 | 3.57310700  | -0.13855900 |
| C | -0.77199300 | 3.45161400  | 0.03875400  |
| C | 0.45600700  | 2.76867200  | 0.08861500  |
| N | 0.61812700  | 1.41104800  | 0.09367000  |
| C | 1.75413700  | 3.40337500  | 0.13656500  |
| C | 1.96130800  | 1.15822500  | 0.12899500  |
| C | 2.68132500  | 2.41196800  | 0.14867400  |
| C | 2.56147900  | -0.11373000 | 0.13009900  |
| C | -1.06169600 | -4.93860000 | 0.07959200  |
| C | -1.48615700 | -5.66031300 | -1.04059800 |
| C | -0.69791400 | -5.63836000 | 1.23458300  |
| C | -1.54714500 | -7.05095900 | -1.00662100 |
| C | -0.75788500 | -7.02895100 | 1.26973500  |
| C | -1.18326600 | -7.73891700 | 0.14893200  |
| C | 4.05482100  | -0.16450800 | 0.15284900  |
| C | 4.77542900  | 0.22579200  | 1.28953100  |
| C | 4.77255100  | -0.59969900 | -0.96042700 |
| C | 6.16038900  | 0.18665000  | 1.30712400  |
| C | 6.16588500  | -0.64859100 | -0.95897500 |
| C | 6.86818300  | -0.24907400 | 0.18016700  |
| C | -0.72205900 | 4.94607200  | 0.01955900  |
| C | -0.22961100 | 5.62823900  | -1.09775200 |
| C | -1.16792900 | 5.68619000  | 1.11926400  |
| C | -0.18079700 | 7.01955700  | -1.11453200 |
| C | -1.12046700 | 7.07773600  | 1.10345400  |
| C | -0.62566900 | 7.74790700  | -0.01324100 |
| C | -5.83046000 | 0.17210900  | -0.12580300 |

|    |             |             |             |
|----|-------------|-------------|-------------|
| C  | -6.52333200 | -0.28630900 | -1.25115400 |
| C  | -6.56030600 | 0.68272100  | 0.95288500  |
| C  | -7.91382200 | -0.23355800 | -1.29863400 |
| C  | -7.95072500 | 0.73649100  | 0.90653200  |
| C  | -8.63119200 | 0.27877700  | -0.21975100 |
| O  | 8.21818600  | -0.24853300 | 0.29184100  |
| H  | 1.62443400  | -4.64392600 | 0.10220600  |
| H  | 3.57577700  | -2.81728000 | 0.17374500  |
| H  | -3.70823200 | -4.45838700 | 0.12858800  |
| H  | -5.53476700 | -2.50687500 | 0.06432100  |
| H  | -5.34255500 | 2.82209900  | -0.28356700 |
| H  | -3.39047600 | 4.64678100  | -0.21134200 |
| H  | 1.93094900  | 4.46937500  | 0.15502700  |
| H  | 3.75661600  | 2.51777600  | 0.17052900  |
| H  | -1.76888600 | -5.12378800 | -1.94201600 |
| H  | -0.37040700 | -5.08444600 | 2.10992200  |
| H  | -1.87725800 | -7.59700800 | -1.88542200 |
| H  | -0.47636500 | -7.55735400 | 2.17579900  |
| H  | -1.23258700 | -8.82340200 | 0.17663200  |
| H  | 4.23820200  | 0.56498100  | 2.17077000  |
| H  | 4.23454200  | -0.90694900 | -1.85294800 |
| H  | 6.71783300  | 0.48873900  | 2.18798600  |
| H  | 6.68330500  | -0.99384300 | -1.84635200 |
| H  | 0.11495700  | 5.06017100  | -1.95730900 |
| H  | -1.55143100 | 5.16370000  | 1.99111500  |
| H  | 0.20316700  | 7.53413300  | -1.99038200 |
| H  | -1.46704100 | 7.63809800  | 1.96674800  |
| H  | -0.58672800 | 8.83310800  | -0.02551600 |
| H  | -5.96409200 | -0.68204000 | -2.09424400 |
| H  | -6.03030500 | 1.03758400  | 1.83228200  |
| H  | -8.43612600 | -0.58966700 | -2.18164400 |
| H  | -8.50230100 | 1.13402900  | 1.75332000  |
| H  | -9.71563500 | 0.32218500  | -0.25716700 |
| C  | 8.99382300  | -0.63653200 | -0.83385500 |
| H  | 8.78292700  | -1.68477300 | -1.08545000 |
| H  | 8.72799500  | -0.01357600 | -1.70001400 |
| C  | 10.45939200 | -0.45015700 | -0.48114400 |
| H  | 10.69872400 | -1.08311200 | 0.38141500  |
| H  | 11.05159600 | -0.82407500 | -1.32478400 |
| C  | 10.82123600 | 1.00455800  | -0.18675800 |
| H  | 10.25461200 | 1.38102700  | 0.66973600  |
| H  | 11.88762000 | 1.10500600  | 0.03794900  |
| H  | 10.59622400 | 1.64453400  | -1.04809300 |
| Zn | -0.88944300 | 0.00335600  | 0.02951000  |

### Compound 3 absorption spectrum calculation and input keywords

#p scrf=(solvent=chloroform) geom=connectivity gfinput gfprint iop(6/7=3) pop=full

pseudo=read td=(nstates=30)

Charge=0, Multiplicity=1

Cartesian coordinates (Angströms)

|   |             |             |             |
|---|-------------|-------------|-------------|
| C | 4.27293700  | -1.92996200 | -0.15254800 |
| C | 3.47103600  | -0.85742400 | -0.31322000 |
| C | 2.02874200  | -0.98151000 | -0.31884400 |
| C | 1.49889600  | -2.31327100 | -0.10403200 |
| C | 2.28871000  | -3.40686800 | 0.05702300  |
| C | 3.73229900  | -3.28639300 | 0.03296400  |
| C | 1.16927800  | 0.07475200  | -0.46915700 |
| C | -0.71142400 | -1.46905400 | -0.20139200 |
| C | -0.25367100 | -0.15963800 | -0.43204000 |
| C | -1.22798500 | 0.83902900  | -0.60305600 |
| H | -0.91550800 | 1.85864400  | -0.80172400 |
| C | -2.57905800 | 0.55908000  | -0.52750400 |
| C | -3.00056700 | -0.76220600 | -0.28046100 |
| C | -2.05905400 | -1.77878400 | -0.12224600 |
| H | 5.35328700  | -1.82845000 | -0.14748000 |
| H | 3.89957000  | 0.13124600  | -0.43827200 |
| H | 1.84727500  | -4.38425800 | 0.21429000  |
| H | -3.29457700 | 1.35946500  | -0.66266900 |
| H | -2.37719300 | -2.79854200 | 0.05875500  |
| O | 0.15407900  | -2.50116500 | -0.04618800 |
| O | -4.28880000 | -1.13842200 | -0.18574300 |
| O | 4.48577500  | -4.26342300 | 0.17114400  |
| C | 1.67254700  | 1.45500500  | -0.71789800 |
| C | 1.55563500  | 2.49518300  | 0.22147100  |
| C | 2.22799600  | 1.73417000  | -1.96939500 |
| C | 1.99019000  | 3.78080200  | -0.10882400 |
| C | 2.67246900  | 3.01518400  | -2.28432000 |
| H | 2.30386400  | 0.93745200  | -2.70263400 |
| C | 2.55473200  | 4.04209800  | -1.35161600 |
| H | 1.88409600  | 4.57006200  | 0.62738100  |
| H | 3.10770400  | 3.20718400  | -3.25933100 |
| H | 2.89871600  | 5.04268700  | -1.59030200 |
| C | 0.95778700  | 2.31465700  | 1.58038900  |
| O | 0.40370200  | 3.20570500  | 2.19289500  |
| O | 1.10624300  | 1.07745200  | 2.04942800  |
| C | -5.31595500 | -0.15567700 | -0.33299200 |
| H | -5.23584500 | 0.31130500  | -1.32308300 |
| H | -5.19155400 | 0.62086600  | 0.43284100  |
| C | -6.65469100 | -0.85060500 | -0.17496100 |
| H | -6.73896700 | -1.63507300 | -0.93442700 |
| H | -6.68561100 | -1.34151500 | 0.80342400  |
| C | -7.81198200 | 0.13888800  | -0.30556400 |
| H | -8.77122400 | -0.37173700 | -0.18970500 |



|   |             |             |             |
|---|-------------|-------------|-------------|
| H | -7.75452400 | 0.91932800  | 0.46035500  |
| H | -7.80920400 | 0.62713400  | -1.28568500 |
| C | 0.46387700  | 0.77863500  | 3.29537300  |
| H | 0.86127700  | 1.41362200  | 4.08875200  |
| H | -0.61338600 | 0.93089600  | 3.20325700  |
| H | 0.68735000  | -0.26805500 | 3.49105900  |

## 7. References

1 M. J. Frisch, G. W. Trucks, H. B. Schlegel, G. E. Scuseria, M. A. Robb, J. R. Cheeseman, G. Scalmani, V. Barone, B. Mennucci, G. A. Petersson, H. Nakatsuji, M. Caricato, X. Li, H. P. Hratchian, A. F. Izmaylov, J. Bloino, G. Zheng, J. L. Sonnenberg, M. Hada, M. Ehara, K. Toyota, R. Fukuda, J. Hasegawa, M. Ishida, T. Nakajima, Y. Honda, O. Kitao, H. Nakai, T. Vreven, J. A. Montgomery, Jr., J. E. Peralta, F. Ogliaro, M. Bearpark, J. J. Heyd, E. Brothers, K. N. Kudin, V. N. Staroverov, R. Kobayashi, J. Normand, K. Raghavachari, A. Rendell, J. C. Burant, S. S. Iyengar, J. Tomasi, M. Cossi, N. Rega, N. J. Millam, M. Klene, J. E. Knox, J. B. Cross, V. Bakken, C. Adamo, J. Jaramillo, R. Gomperts, R. E. Stratmann, O. Yazyev, A. J. Austin, R. Cammi, C. Pomelli, J. W. Ochterski, R. L. Martin, K. Morokuma, V. G. Zakrzewski, G. A. Voth, P. Salvador, J. J. Dannenberg, S. Dapprich, A. D. Daniels, O. Farkas, J. B. Foresman, J. V. Ortiz, J. Cioslowski and D. J. Fox, *Gaussian 09, Revision A.1*, Gaussian, Inc., Wallingford, CT, 2009.
